## **In vivo microscopy reveals the impact of *Pseudomonas aeruginosa***

### **2 social interactions on host colonization**

Chiara Rezzoagli<sup>1\*</sup>, Elisa T. Granato<sup>2</sup>, Rolf Kümmerli<sup>1\*</sup>

4 <sup>1</sup>Department of Plant and Microbial Biology, University of Zurich, Zurich,  
Switzerland

6 <sup>2</sup>Department of Zoology, University of Oxford, Oxford, United Kingdom

8 \* Corresponding authors:

Chiara Rezzoagli or Rolf Kümmerli, Department of Plant and Microbial  
10 Biology, University of Zurich, Winterthurerstrasse 190, 8057 Zurich,  
Switzerland.

12 Email: chiara.rezzoagli@uzh.ch (CR), rolf.kuemmerli@uzh.ch (RK).

Phone: +41 44 635 48 01.

14

## Abstract

16 Pathogenic bacteria engage in social interactions to colonize hosts, which  
include quorum-sensing-mediated communication and the secretion of  
18 virulence factors that can be shared as “public goods” between individuals.  
While in-vitro studies demonstrated that cooperative individuals can be  
20 displaced by “cheating” mutants freeriding on social acts, we know little about  
social interactions in infections. Here, we developed a live imaging system to  
22 track virulence factor expression and social strain interactions in the human  
pathogen *Pseudomonas aeruginosa* colonizing the gut of *Caenorhabditis*  
24 *elegans*. We found that shareable siderophores and quorum-sensing systems  
are expressed during infections, affect host gut colonization, and benefit non-  
26 producers. However, non-producers were unable to cheat and outcompete  
producers, probably due to the spatial segregation of strains within the gut.  
28 Our results shed new light on bacterial social interactions in infections and  
reveal potential limits of therapeutic approaches that aim to capitalize on  
30 social dynamics between strains for infection control.

## Introduction

32 During infections, pathogenic bacteria secrete a wide range of extracellular  
virulence factors in order to colonize and grow inside the host (Rahme et al.,  
34 1995; Wu et al., 2008; Balasubramanian et al., 2013). Secreted molecules  
include siderophores for iron scavenging, signaling molecules for quorum  
36 sensing (QS), toxins to attack host cells, and matrix compounds for biofilm  
formation (Diggle et al., 2007; West et al., 2007; Henkel et al., 2010; Flemming  
38 et al., 2016; Granato et al., 2016). In-vitro studies have shown that  
extracellular virulence factors can be shared as “public goods” between cells,  
40 and thereby benefit individuals other than the producing cell (Köhler et al.,  
2009; Raymond et al., 2012; Harrison, 2013). There has been enormous  
42 interest in understanding how this form of bacterial cooperation can be  
evolutionarily stable, because secreted public goods can be exploited by non-  
44 cooperative mutants called “cheats”, which do not engage in cooperation yet  
still benefit from the molecules produced by others (Griffin et al., 2004; Diggle  
46 et al., 2007; West et al., 2007; Ross-Gillespie et al., 2007; Sandoz et al., 2007;  
Kümmerli et al., 2009a, 2015; Popat et al., 2012; Ghoul et al., 2014; O’Brien et  
48 al., 2017; Özkaya et al., 2018).

50 There is increasing evidence that social interactions and cooperator-cheat  
dynamics might also matter within hosts (West and Buckling, 2003; Buckling  
52 and Brockhurst, 2008; Harrison, 2013; Leggett et al., 2014). For instance, in a  
set of controlled infection experiments, it was shown that engineered non-  
54 producers, deficient for the production of specific virulence factors, can  
outcompete producers and thereby reduce virulence (Harrison et al., 2006;

56 Rumbaugh et al., 2009, 2012; Pollitt et al., 2014), but there are also cases  
where the success of non-producers was compromised (Zhou et al., 2014;  
58 Harrison et al., 2017). Other studies have followed chronic human infections  
within patients over time and reported that virulence-factor-negative mutants  
60 emerge and spread, with the mutational patterns suggesting cooperator-cheat  
dynamics (Köhler et al., 2009; Andersen et al., 2015, 2018). These findings  
62 spurred ideas of how social interactions within hosts could be manipulated for  
therapeutic purposes (Brown et al., 2009; Allen et al., 2014; Leggett et al.,  
64 2014). Suggested approaches include (i) the induction of cooperator-cheat  
dynamics to steer infections towards lower virulence (Köhler et al., 2009;  
66 Granato et al., 2018), (ii) the introduction of less virulent strains with medically  
beneficial alleles into established infections (Brown et al., 2009), and (iii) the  
68 specific targeting of secreted virulence factors to control infections (Clatworthy  
et al., 2007; Rasko and Sperandio, 2010) and to constrain the evolution of  
70 resistance (André and Godelle, 2005; Pepper, 2012; Allen et al., 2014;  
Rezzoagli et al., 2018).

72

However, all of these approaches explicitly rely on the assumption that the  
74 social traits of interest are: (i) expressed inside hosts; (ii) important for host  
colonization; (iii) exploitable; and (iv) induce cooperator-cheat dynamics as  
76 observed in vitro (Harrison, 2013) – assumptions that have not yet been tested  
in real time inside living hosts. Here, we explicitly test the importance of  
78 bacterial social interactions within hosts by using in-vivo fluorescence  
microscopy to monitor bacterial virulence factor production, host colonization  
80 and strain interactions in a model system, which consist of the opportunistic

pathogen *Pseudomonas aeruginosa* infecting the nematode  
82 *Caenorhabditis elegans* (Tan and Ausubel, 2000; Ewbank, 2002; Papaioannou  
et al., 2013; Utari and Quax, 2013).

84

*C. elegans* naturally preys on bacteria (Félix and Braendle, 2010). While most  
86 bacteria are killed during ingestion, a small fraction of cells survives (Portal-  
Celhay et al., 2012), which can, in the case of pathogenic bacteria, establish  
88 an infection in the gut (Tan et al., 1999). *P. aeruginosa* deploys an arsenal of  
virulence factors that facilitate successful host colonization (Nadal Jimenez et  
90 al., 2012). For example, the two siderophores pyoverdine and pyochelin  
scavenge host-bound iron during acute infections to enable pathogen growth  
92 (Meyer et al., 1996; Takase et al., 2000; Cornelis and Dingemans, 2013;  
Parrow et al., 2013; Becker and Skaar, 2014; Granato et al., 2016).  
94 *P. aeruginosa* further secretes the protease elastase, the toxin pyocyanin, and  
rhamnolipid biosurfactants to attack host tissue (Smith and Iglewski, 2003;  
96 Alibaud et al., 2008; Köhler et al., 2009; Rumbaugh et al., 2009; Zaborin et al.,  
2009). Production of these latter virulence factors only occurs at high cell  
98 densities and is controlled by the Las and the Rhl quorum sensing (QS)  
systems (Lee and Zhang, 2015). Because both the QS-regulon and  
100 siderophores were shown to be involved in *C. elegans* killing (Mahajan-Miklos  
et al., 1999; Tan et al., 1999; Papaioannou et al., 2009; Zaborin et al., 2009;  
102 Cezairliyan et al., 2013; Kirienko et al., 2013; Zhu et al., 2015), we used them  
as focal traits for our study.

104

To tackle our questions, we first conducted experiments with fluorescently  
106 tagged *P. aeruginosa* bacteria (PAO1) to follow infection dynamics from first  
uptake, through feeding and up to a progressed state of gut infection. We then  
108 constructed promoter gene fusions for genes involved in the synthesis of the  
two siderophores (pyoverdine and pyochelin) and the two QS-regulators (LasR  
110 and RhIR) to track in vivo virulence factor gene expression during host  
colonization. Subsequently, we used single and double mutant strains  
112 deficient for virulence factors to determine whether they show compromised  
colonization abilities. And most crucially, we followed mixed infections of  
114 wildtype and mutants over time to determine the extent of strain co-localization  
in the gut, and to test whether secreted virulence factors are indeed  
116 exploitable by non-producers in the host.

## 118 **Results**

### **PAO1 colonization dynamics in the *C. elegans* gut**

120 For all our infection experiments, we followed the protocol depicted in Figure  
1A-C. We first exposed worms to *P. aeruginosa* for 24 hours on a nutrient  
122 plate. Subsequently, worms were removed, washed, and treated with  
antibiotics to kill external bacteria. We then imaged infected worms under the  
124 microscope at different time points and quantified bacterial density and gene  
expression profiles using fluorescent mCherry markers. We first confirmed that  
126 mCherry fluorescence is a suitable proxy for the number of live bacteria in  
*C. elegans*, by comparing the fluorescence intensities in whole worms  
128 (Figure 1B) to the number of live bacteria recovered from the worms' gut. We  
found that fluorescence intensity values positively correlated with the bacterial

130 load inside the nematodes, both immediately after recovering the worms from  
the exposure plates and at 6 hours post exposure (hpe; Supplementary Figure  
132 S1, Pearson correlation coefficient at 0 hpe:  $r = 0.49$ ,  $t_{28} = 3.02$ ,  $p = 0.0053$ ; at  
6 hpe:  $r = 0.713$ ,  $t_{23} = 4.88$ ,  $p < 0.0001$ ). As our goal was to image infections in  
134 living hosts, we further confirmed that worms stayed alive during the  
observation period (Supplementary Figure S2).

136

When using fluorescence intensity to follow host colonization by the wildtype  
138 PAO1-mCherry strain over time, we observed that immediately after removal  
from the exposure plate, worms carried large amounts of bacteria in their gut  
140 (Figure 1D). Subsequently, bacterial load significantly declined when the  
worms were kept in buffer for 6 hours (ANOVA:  $t_{391} = -8.55$ ,  $p < 0.001$ ) and  
142 remained constant for the next 24 hours ( $t_{391} = 0.61$ ,  $p = 0.529$ ). This pattern  
suggests that a large number of bacteria are taken up during the feeding  
144 phase, of which a high proportion is shed afterwards, leaving behind a fraction  
of live bacteria that establishes an infection and colonizes the worm gut.

146

### 148 **PAO1 expresses siderophore biosynthesis genes and QS regulators in the host**

We then examined whether genes involved in the synthesis of pyoverdine  
150 (*pvdA*) and pyochelin (*pchEF*), and the genes *lasR* and *rhIR* encoding two  
major QS-regulators, are expressed inside hosts. Worms were exposed to four  
152 different PAO1 wildtype strains each carrying a specific promoter-mCherry  
gene reporter fusion. Imaging after the initial uptake phase (0 hpe) revealed  
154 that, with the exception of *pchEF*, all genes were significantly expressed in the

host (Figure 2; ANOVA, comparisons to the non-fluorescent control, for *pvdA*:  
156  $t_{754} = 4.23$ ,  $p < 0.001$ ; for *pchEF*:  $t_{754} = 0.74$ ,  $p = 0.461$ ; for *lasR*:  $t_{754} = 2.96$ ,  $p =$   
0.003; for *rhlR*:  $t_{754} = 10.37$ ,  $p < 0.001$ ). Although fluorescence intensity  
158 declined over time (linear model,  $F_{1,1795} = 48.98$ ,  $p < 0.001$ ), we observed that  
apart from *pchEF*, all genes were still significantly expressed at 30 hpe (Figure  
160 2; ANOVA, for *pvdA*:  $t_{754} = 4.87$ ,  $p < 0.001$ ; for *pchEF*:  $t_{754} = 0.684$ ,  $p = 0.461$ ;  
for *lasR*:  $t_{754} = 3.01$ ,  $p = 0.003$ ; for *rhlR*:  $t_{754} = 16.68$ ,  $p < 0.001$ ). These results  
162 suggest that the siderophore pyoverdine and QS-regulated traits may be  
important for both initial uptake and subsequent colonisation of the host.

164

### **Regulatory links between social traits operate inside the host**

166 We know that regulatory links exist between the virulence traits studied here.  
While pyoverdine synthesis suppresses pyochelin production under stringent  
168 iron limitation (Dumas et al., 2013), the Las-QS system positively activates the  
Rhl-QS system (Lee and Zhang, 2015). To test whether these links operate  
170 inside the nematode host, we measured gene expression of each trait in the  
negative background of the co-regulated trait (Figure 3). For *pvdA*, we  
172 observed significant gene expression levels in both the wildtype PAO1 and the  
pyochelin-deficient PAO1  $\Delta pchEF$  strain (Figure 3A), albeit the overall  
174 expression was slightly reduced in PAO1  $\Delta pchEF$  (t-test,  $t_{253} = 8.67$ ,  $p <$   
0.001). For *pchEF*, expression patterns confirm the suppressive nature of  
176 pyoverdine: the pyochelin synthesis gene was not expressed in the wildtype  
but significantly upregulated in the pyoverdine-deficient PAO1  $\Delta pvdD$  strain  
178 (Figure 3B;  $t_{296} = -19.68$ ,  $p < 0.001$ ). For *lasR*, we found that gene expression  
was not significantly different in the wildtype PAO1 compared to the Rhl-



180 negative mutant PAO1  $\Delta rhIR$ , confirming that the Las-QS system is at the top  
of the hierarchy and not influenced by the Rhl-system (Figure 3C;  $t_{211} = -1.50$ ,  
182  $p = 0.136$ ). Conversely, the expression of *rhIR* was strongly dependent on a  
functional Las-system, and therefore only expressed in the wildtype PAO1, but  
184 repressed in the Las-negative mutant PAO1  $\Delta lasR$  (Figure 3D;  $t_{156} = 19.04$ ,  $p$   
 $< 0.001$ ). Taken together, these analyses show that (i) iron-limitation is strong  
186 in *C. elegans* as the wildtype primarily invests in the more potent siderophore  
pyoverdine; (ii) pyochelin can potentially have compensatory effects when  
188 pyoverdine is lacking; and (iii) the loss of the Las-system leads to the  
concomitant collapse of the Rhl-system.

190

### **Virulence-factor-negative mutants show trait-specific deficiencies in host 192 colonization**

To examine whether the ability to produce shared virulence factors is  
194 important for initial bacterial uptake and host colonization, we exposed  
*C. elegans* to five isogenic mutants of the PAO1-mCherry strain, either  
196 impaired in the production of pyoverdine ( $\Delta pvdD$ ), pyochelin ( $\Delta pchEF$ ), both  
siderophores ( $\Delta pvdD\Delta pchEF$ ), the QS receptor LasR ( $\Delta lasR$ ), or the QS  
198 receptor RhlR ( $\Delta rhIR$ ). When analyzing bacterial load after the feeding phase,  
we observed that the wildtype and all three siderophores mutants were equally  
200 abundant inside hosts, whereas bacterial load was significantly reduced for the  
two QS-mutants compared to the wildtype (Figure 4A; ANOVA, significant  
202 variation among strains  $F_{5,736} = 10.50$ ,  $p < 0.001$ ; post-hoc Tukey test for  
multiple comparisons:  $p > 0.05$  for all siderophore mutants,  $p = 0.021$  for  
204 PAO1  $\Delta lasR$ ,  $p < 0.001$  for PAO1  $\Delta rhIR$ ).

206 Consistent with our findings for PAO1 wildtype colonization (Figure 1D), we  
observed that the bacterial load of all strains declined at 6 hpe (Supplementary  
208 Figure S3) and 30 hpe (Figure 4B) following worm removal from the exposure  
plates. This decline was significantly more pronounced for the double-  
210 siderophore knockout PAO1  $\Delta pvdD\Delta pchEF$  than for the wildtype (Figure 4B;  
ANOVA, post-hoc Tukey test  $p < 0.001$ ). In contrast, we found that the  
212 mutants deficient in pyochelin (PAO1  $\Delta pchEF$ ) and RhIR (PAO1  $\Delta rhIR$ )  
production showed a significantly higher ability to remain in the host than the  
214 wildtype (Figure 4B; ANOVA, post-hoc Tukey test  $p < 0.001$  for both strains).  
Taken together, our findings suggest that the two siderophores can  
216 complement each other, and that only the siderophore double mutant and the  
LasR-deficient strain have an overall disadvantage in colonizing worms.

218

**Mixed communities are formed inside hosts, but exploitation of social  
220 traits is constrained**

Given our findings on colonization deficiencies, we reasoned that the  
222 siderophore-double mutant (PAO1  $\Delta pvdD\Delta pchEF$ ) and the Las-deficient  
mutant (PAO1  $\Delta lasR$ ) could act as cheats and benefit from the exploitation of  
224 virulence factors produced by the wildtype in mixed infections. To test this  
hypothesis, we first competed the wildtype PAO1-mcherry against the  
226 untagged PAO1 strain in the host, and found that the mCherry tag had a small  
but negative effect on PAO1 fitness (Figure 5A; one sample t-test,  $t_{24} = -4.12$ ,  
228  $p < 0.001$ ). We then competed the wildtype PAO1-mcherry against the two  
putative cheats in the host and found that neither of the two mutants could

230 gain a significant fitness advantage over the wildtype, but also did not lose out  
(Figure 5A; ANOVA,  $F_{2,70} = 0.517$ ,  $p = 0.598$ ). These results indicate that  
232 mutants, deficient for virulence factor production and compromised in host  
colonization, can indeed benefit from the presence of the wildtype producer,  
234 but not to an extent that would allow them to increase in frequency and  
displace producers.

236

Since the wildtype alone was able to maintain higher bacterial loads in the  
238 worms compared to the two mutants (Figure 4B), we hypothesized that  
frequencies of the wildtype in mixed infections should positively correlate with  
240 the total bacterial load in the gut. Consistent with our predictions, we found  
that at 6 hpe, the frequency of wildtype PAO1-mCherry positively correlated  
242 with bacterial load in mixed infections with the two non-producers, but not in  
the control mixed infections with the untagged wildtype (Pearson correlation  
244 coefficient,  $r = 0.54$ ,  $t_{17} = 2.67$ ,  $p = 0.016$  (PAO1  $\Delta lasR$ ),  $r = 0.40$ ,  $t_{17} = 1.77$ ,  $p$   
 $= 0.031$  (PAO1  $\Delta pvdD\Delta pchEF$ );  $r = 0.12$ ,  $t_{17} = 0.47$ ,  $p = 0.639$  (PAO1)). These  
246 correlations disappeared at the later colonization stage (48 hpe; Pearson  
correlation coefficient  $r < 0$  for all strains).

248

### 250 **Spatial distribution and strain co-localization varies substantially across host individuals**

Previous in-vitro studies have shown that the spatial proximity of cells is  
252 crucial for the efficient sharing of secreted compounds (Kümmerli et al.,  
2009a; Van Gestel et al., 2014; Scholz and Greenberg, 2015; Weigert and  
254 Kümmerli, 2017). To assess spatial proximity of co-infecting strains in vivo, we

256 imaged worms exposed to a mix of two strains tagged with either GFP or  
mCherry and determined strain co-localization in the host (Figure 6). We found  
that all worms were colonized by both strains, but co-localization within the  
258 worm varied greatly across individuals. Specifically, the correlation between  
mCherry and GFP fluorescence from tail to head ranged from almost perfect  
260 co-localization in some worms (Figure 6A;  $r = 1$ ,) to near complete spatial  
segregation in other individuals (Figure 6B;  $r < 0$ ,). Similar co-localization  
262 patterns emerged for all three strain combinations tested, highlighting that the  
type of competitor did not influence the degree of strain co-localization in the  
264 host gut (Figure 6C; ANOVA,  $F_{2,102} = 2.17$ ,  $p = 0.119$ ). Important to note in this  
context is that we calculated co-localization based on a 2-dimensional  
266 projection of a 3-dimensional organ (i.e. the gut), which might overestimate the  
level of co-localization along the z-axis.

268

## Discussion

270 We developed a live imaging system that allows us to track host colonization  
by pathogenic bacteria (*P. aeruginosa*) and the expression of bacterial  
272 virulence factors inside hosts (*C. elegans*). We used this system to focus on  
the role of secreted virulence factors, which can be shared as public goods  
274 between bacterial cells, and examined competitive dynamics between  
virulence factor producing and non-producing strains in the host. We found  
276 that the two shareable siderophores pyoverdine and pyochelin and the social  
Las and Rhl quorum-sensing systems: (i) are expressed inside the host, (ii)  
278 affect the ability to colonize and reside within the nematodes; (iii) allow non-  
producers to benefit from virulence factors secreted by producers in mixed

280 infections; but (iv) do not allow non-producers to cheat and outcompete  
producers. Our results have implications for both the understanding of  
282 bacterial social interactions within hosts, and therapeutic approaches that seek  
to take advantage of social dynamics between strains for infection control.

284

Numerous in-vitro studies have shown that cooperative bacterial cooperation  
286 can be exploited by cheating mutants that no longer express the social trait,  
but benefit from the cooperative acts performed by others (Griffin et al., 2004;  
288 Diggle et al., 2007; West et al., 2007; Ross-Gillespie et al., 2007; Sandoz et  
al., 2007; Kümmerli et al., 2009a, 2015; Popat et al., 2012; Ghoul et al., 2014;  
290 O'Brien et al., 2017; Özkaya et al., 2018). While these studies showed that  
cheating allows non-producers to out-compete producers, we found that the  
292 spread of non-producers was constraint within infections. There are multiple  
reasons that could explain this constraint. First, increased spatial structure is  
294 known to limit bacterial dispersal and the diffusion of secreted metabolites  
(Kümmerli et al., 2009a; Weigert and Kümmerli, 2017). As a consequence,  
296 metabolite sharing becomes more local, i.e. among clonal neighbors in  
growing microcolonies, which restricts non-producers in accessing the public  
298 goods. In infection systems such as ours, where bacteria attach to host tissue,  
spatial structure is likely high, and public good sharing might be limited.  
300 Indeed, as shown in Figure 6, co-infecting strains within the worm gut can be  
strongly spatially segregated, which could explain the limits of cheating. Taken  
302 together, our results are in line with work by Zhou *et al* (2014) who showed  
that QS-mutants of *Bacillus thuringiensis* infecting an insect caterpillar could

304 not exploit metabolites from producers because they were spatially separated  
in the host.

306

Second, negative frequency-dependent selection could explain why the  
308 spread of virulence factor negative mutants is constrained (Ross-Gillespie et  
al., 2007). This scenario predicts that cheaters only experience a selective  
310 advantage when rare, because then they are surrounded by producers and  
can exploit public goods most efficiently. At high frequency, meanwhile, non-  
312 producers might be selected against because the accessibility of public goods  
is reduced. The results from our competition assay provide indirect evidence  
314 for negative frequency-dependent selection in the nematode gut (Figure 5B).  
Specifically for mixed infections, we observed that bacterial load was reduced  
316 when producers occurred at low frequency early during infection (6 hpe), but  
not later on (48 hpe). This pattern is compatible with the view that rare  
318 producers have a selective advantage, increase in relative frequency and  
restore bacterial load.

320

Third, the relatively low bacterial density observed in the gut could further  
322 compromise the ability of non-producers to cheat (Figure 1D, 5B). Low cell  
density restricts the sharing and therefore also the exploitation of secreted  
324 compounds (Ross-Gillespie et al., 2009; Van Gestel et al., 2014; Scholz and  
Greenberg, 2015). Mechanisms that contribute to the persistent low bacterial  
326 density in the gut (Figure 1D, 5B) could include the peristaltic activity of the  
gut, constantly expelling a part of the pathogen population and the host

328 immune system, killing a fraction of the bacteria (Pukkila-Worley and Ausubel,  
2012).

330

Fourth, our analysis reveals that the expression of pyoverdine and QS-  
332 systems decline over time during host colonization (Figure 2). This could mean  
that the costs and benefits of shared virulence factors are reduced at later  
334 stages of the infection, or that bacteria switch from the production to the  
recycling of already secreted public goods (Imperi et al., 2009; Kümmerli and  
336 Brown, 2010). The spread of non-producers might be hampered in this case  
because the exploitability of a trait depends on its expression level (Kümmerli  
338 et al., 2009b; Jiricny et al., 2010).

340 Finally, our analysis shows that the regulatory linkage between traits is an  
important factor to consider when predicting the putative advantage of non-  
342 producers (Ross-Gillespie et al., 2015; Lindsay et al., 2016; dos Santos et al.,  
2018). For instance, we found that *P. aeruginosa* mutants deficient for  
344 pyoverdine production upregulated pyochelin to compensate for the lack of  
their primary siderophore (Figure 3). Thus, if pyoverdine-negative mutants  
346 evolve *de novo*, their spread as cheaters could be hampered because they  
invest in pyochelin as an alternative public good (Ross-Gillespie et al., 2015).  
348 For QS, meanwhile, we observed that the absence of a functional Las-system  
resulted in the concomitant collapse of the Rhl-system. Although *lasR* mutants  
350 could be potent cheats as they are deficient for multiple social traits, their  
spread might be hampered because QS-systems also regulate non-social  
352 traits, which are important for individual fitness (Dandekar et al., 2012). In the

context of infections, *lasR*-mutants evolve frequently, with their spread being  
354 partly attributable to cheating, but also to modifications in the QS-hierarchy  
and a shift from a pathogenic to a commensalistic lifestyle (Jansen et al.,  
356 2015; Feltner et al., 2016; Granato et al., 2018).

358 When relating our work to previous studies, it turns out that earlier work  
produced mixed results with regard to the question whether siderophore- and  
360 QS-deficient mutants can spread in infections. Harrison *et al.* (2006, 2017;  
pyoverdine, *P. aeruginosa* in *Galleria mellonella* and a range of ex-vivo  
362 infection models) and Zhou *et al.* (2014; QS, *B. thuringiensis* in *Plutella*  
*xylostella*) showed that the spread of non-producers is constrained, whereas  
364 Rumbaugh *et al.* (2009, 2012; QS; *P. aeruginosa* in mice) and Pollitt *et al.*  
(2014; QS, *Staphylococcus aureus* in *G. mellonella*) demonstrated cases  
366 where non-producers spread to high frequencies in host populations. While  
the reported results were mainly based on count data (i.e. strain frequency  
368 before and after competition), we here show that information on social trait  
expression, temporal infection dynamics and physical interactions among  
370 strains within hosts are essential to understand whether social traits are  
important and exploitable in a given system (see also Zhou *et al.* (2014) for a  
372 similar approach regarding the spatial scale of strain interactions). Based on  
these novel insights, we posit that more of such detailed approaches are  
374 required to understand the importance of bacterial social interactions across  
host systems and infection contexts and explain differences between them.

376



A deeper understanding of bacterial social interactions inside hosts are  
378 particularly relevant for a number of novel therapeutic approaches that seek to  
take advantage of social dynamics between cooperative and cheating strains  
380 inside hosts to control infections. For instance, it was proposed that strains  
deficient for the production of important virulence factors could be introduced  
382 into established infections (Brown et al., 2009). These strains are expected to  
spread because of cheating, thereby reducing the overall virulence factor  
384 availability in the population, and consequently the damage to the host. Our  
results now reveal that cheater strains, although gaining a benefit from the  
386 presence of producer strains, are unable to spread in populations. Another  
therapeutic approach involves the specific targeting of secreted virulence  
388 factors to curb virulence (André and Godelle, 2005; Allen et al., 2014). This  
approach is thought to not only reduce damage to the host, but also to  
390 compromise resistance evolution (Pepper, 2012). The idea here is that  
resistant mutants, resuming virulence factor production, would act as  
392 cooperators, sharing the benefit of secreted goods with susceptible strains;  
and for this reason they are not expected to spread (Mellbye and Schuster,  
394 2011; Gerdt and Blackwell, 2014; Ross-Gillespie et al., 2014). Our results now  
indicate that such cooperative drug-resistant mutants could get at least some  
396 local benefits and might increase to a certain frequency in the population  
(Rezzoagli et al., 2018). These confrontations show that the identification of  
398 key parameters driving social interactions across hosts and infection types is  
of utmost importance to predict the success of ‘cheat therapies’ and anti-  
400 virulence strategies targeting secreted public goods.

## 402 **Material and methods**

### **Strain and bacterial growth conditions**

404 Bacterial strains, primers and plasmids used in this study are listed in  
Supplementary Tables S1-S3. Details on strain construction can be found in  
406 the Supplementary Methods. For all experiments, overnight cultures were  
grown in 8 ml Lysogeny broth (LB) medium in 50 ml Falcon tubes, incubated  
408 at 37°C, 220 rpm for 18 hours. We washed overnight cultures with 0.8% NaCl  
solution and adjusted them to  $OD_{600} = 1$ . Solid Nematode Growth Media  
410 (NGM) contained 0.25% Peptone, 50 mM NaCl, 25mM  $[PO_4^-]$ , 5  $\mu$ g/ml  
Cholesterol, 1mM  $CaCl_2$ , 1mM  $MgSO_4$  supplemented with 1.5% agar. Agar  
412 plates (6 cm diameter) were seeded with 50  $\mu$ l of bacterial culture and  
incubated at 25°C for 24 hours. All *P. aeruginosa* strains used in this study  
414 showed equal growth on NGM exposure plates (Supplementary Figure S4.  
Peptone was purchased from BD Biosciences, Switzerland, all other  
416 chemicals from Sigma Aldrich, Switzerland.

### 418 **Nematode culture**

We used the temperature-sensitive, reproductively sterile *C. elegans* strain  
420 JK509 (glp-1(q231) III): this strain is fertile at 16°C but does not develop  
gonads and is therefore sterile at 25°C. Worms were maintained at the  
422 permissive temperature (16°C) on High Growth Media (HGM) agar plates (2%  
Peptone, 50 mM NaCl, 25mM  $[PO_4^-]$ , 20  $\mu$ g/ml Cholesterol, 1mM  $CaCl_2$ , 1mM  
424  $MgSO_4$ ) seeded with the standard food source *E. coli* strain OP50 (Stiernagle,  
2006). For age synchronization, plates were washed with sterile distilled water  
426 and worms were treated with hypochlorite-sodium hydroxide solution in order

to kill adults worm and isolate eggs (Stiernagle, 2006). These were placed in  
428 M9 buffer (20 mM KH<sub>2</sub>PO<sub>4</sub>, 40 mM Na<sub>2</sub>HPO<sub>4</sub>, 80 mM NaCl, 1 mM MgSO<sub>4</sub>) and  
incubated at 16°C for 16-18 hours to hatch. Then, L1 larvae were transferred  
430 to HGM plates seeded with OP50 and incubated at 25°C for 28 hours to reach  
L4 developmental stage. Worms and the OP50 strain were provided by the  
432 Caenorhabditis Genetic Center (CGC), which is supported by the National  
Institutes of Health - Office of Research Infrastructure Programs (P40  
434 OD010440).

#### 436 ***C. elegans* infection protocol**

Synchronized L4 worms were washed off of HGM plates with M9 buffer + 50  
438 µg/ml kanamycin (M9-Kan), and washed three times with M9-Kan for surface-  
disinfecting the worms. Bacteria, dead worms, and other debris or  
440 contamination were then separated from the viable worm population by the  
sucrose flotation method (Portman, 2006) and rinsed three time in M9 buffer to  
442 remove sucrose. The worm handling protocol for the main experiments is  
depicted in Figure 1A. Specifically, approximately 200 worms were moved to  
444 NGM plates containing a lawn of bacteria and incubated statically for 24 hours  
at 25°C. After this period of exposure to pathogens, infected worms were  
446 extensively washed with M9 buffer + 50 µg/ml chloramphenicol (M9-Cm)  
followed by M9 buffer, and subsequently transferred to individual wells of a 6-  
448 well culture plate filled with sterile M9 buffer supplemented with 5 µg/ml  
cholesterol (M9+Ch Buffer) where they were kept for a total of 48 hours post  
450 exposure (hpe) and imaged at timepoints 0, 6 and 30 hpe. This procedure  
allowed us to clearly distinguish between the initial uptake rate of bacteria

452 through feeding, and the subsequent colonization of the worm gut by surviving  
bacteria.

454

### **Nematode survival assay**

456 Our primary goal was to observe infections inside living hosts and not to kill  
them. To verify that worms stayed alive during the experimental period (up to  
458 time point 48 hpe), we tracked their survival by transferring a fraction of the  
infected population (50-90 worms) to individual wells filled with M9-Ch buffer.  
460 Worms were observed for motility at 0, 24 and 48 hpe, by prodding them with  
a platinum wire. A worm was considered dead when it no longer responded to  
462 touch. Each bacterial strain was tested in three replicates and three  
independent experiments were carried out. We used *E. coli* OP50 as a  
464 negative control for killing. During this period of observation, the worms  
experienced only negligible killing by the colonizing bacteria, and we found no  
466 significant difference in killing between the non-pathogenic *E. coli* food strain  
and the *P. aeruginosa* strains (Supplementary Figure S2). However, there was  
468 a small but significant difference in the survival of worms colonized by the  
three siderophore-mutant strain, compared to the survival of worms infected  
470 by the wildtype PAO1 (ANOVA with post-hoc Tukey test for multiple  
comparisons,  $p = 0.0213$  for PAO1  $\Delta pchEF$ ,  $p = 0.0054$  for PAO1  $\Delta pvdD$  and  
472  $p = 0.0062$  for PAO1  $\Delta pvdD\Delta pchEF$ ).

### **474 Microscopy setup and imaging**

For observations under the microscope, we picked individual worms from the  
476 M9+Ch buffer and paralyzed them with a 25 mM sodium azide solution before

transferring them to a 18-well  $\mu$ -slide (Ibidi). Worms were observed at different  
478 time points: immediately after exposure (0 hpe), as well as after 6 and 30 hpe.  
All experiments were carried out at the Center for Microscope and Image  
480 Analysis of the University Zürich (ZMB). For the colonization experiment,  
images were acquired on a Leica LX inverted widefield light microscope  
482 system with the Leica TX2 filter cube for mCherry (emission:  $560 \pm 40$  nm,  
excitation:  $645 \pm 75$  nm, DM = 595) and a Leica DFC 350 FX, cooled  
484 fluorescence monochrome camera (resolution:  $1392 \times 1040$  pixels) for image  
recording (16-bit color depth). For the gene expression experiment,  
486 microscopy was performed on the InCell Analyzer 2500HS (GE Healthcare)  
automated imaging system, using a polychroic beam splitter BGRFR\_2 (for  
488 mCherry, excitation:  $575 \pm 25$  nm, emission:  $607.5 \pm 19$  nm) and a PCO –  
sCMOS camera (resolution:  $2048 \times 2048$  pixels, 16-bit).

490

### **Image processing and analysis**

492 To extract fluorescence measurements from individual worms, images were  
first segmented (i.e. we divided the image into objects and background), using  
494 an automated image segmentation workflow with the image analysis tool  
*ilastik* (Sommer et al., 2011). Segmented images were then imported in the  
496 free scientific image processing software package Fiji (Schindelin et al., 2012)  
and used to determine fluorescence intensity (as “Raw Integrated Density”, i.e.  
498 the sum of the values of the pixels in the selection) and area of each worm.  
Images obtained from the InCell microscope were acquired dividing each well  
500 of the slide in 64-frames (8x8 grid) with 10% overlap. Tiles were stitched  
together using a macro-automated version of the Stitching plugin in Fiji

502 (Preibisch et al., 2009) and then segmented and analyzed as described  
above. To correct for the autofluorescence of the background and the host  
504 tissue, we imaged, at each time point, worms infected with non-fluorescent  
strains such as *E.coli* OP50-I or PAO1 wildtype and used the mean intensity of  
506 these control infections to correct fluorescent values from worms infected with  
fluorescent strains.

508

### **Competition assay in the host**

510 For in-vivo competitions between the wildtype PAO1-mCherry and the  
siderophore-negative strain PAO1  $\Delta pvdD\Delta pchEF$  or the lasR-mutant PAO1  
512  $\Delta lasR$ , overnight monocultures were washed twice with 0.8% NaCl solution,  
adjusted to  $OD_{600} = 1$  and mixed at 1:1 ratio. To control for fitness effects of  
514 the fluorescent marker mCherry, we also competed the untagged PAO1  
wildtype against PAO1-mCherry. NGM plates were then seeded with 50  $\mu$ l of  
516 mixed culture and incubated at 25°C for 24 hours. Worms were put on the  
mixed bacterial lawn for 24 hours and then recovered as previously described.  
518 After 6 and 48 hours post-exposure, individual worms were picked,  
immobilized with sodium azide and washed for 5 minutes with M9 + 0.003%  
520 NaOCl. Worms were washed twice with M9 buffer. We then transferred each  
individual worm to a 1.5 ml screw-cap micro tube (Sarstedt, Switzerland)  
522 containing sterilized glass beads (1 mm diameter, Sigma Aldrich). Worms  
were disrupted using a bead-beater (TissueLyser II, QIAGEN, Germany),  
524 shaking at 30 Hz for 1.5 min before flipping the tubes and shaking for an  
additional 1.5 min to ensure even disruption (adapted from Vega *et al.*, 2017).  
526 Tubes were then centrifuged at 2000 x g for 2 min, the content was re-

suspended in 200  $\mu$ l of 0.8% NaCl and plated on two LB 1.2 % agar plates for  
528 each sample. Plates were incubated overnight at 37°C and left at room  
temperature for another 24 h to allow the fluorescent marker to fully mature.  
530 We then distinguished between fluorescent and non-fluorescent colonies using  
a custom built fluorescence imaging device (*Infinity 3* camera, Lumenera,  
532 Canada). We then calculated the relative fitness of the wildtype PAO1 as  
 $\ln(v) = \ln\left\{\frac{a_{48} \times (1 - a_6)}{a_6 \times (1 - a_{48})}\right\}$ , where  $a_6$  and  $a_{48}$  are the frequency of  
534 PAO1-mCherry at 6 and 48 hours after recovery, respectively (Ross-Gillespie  
et al., 2007). Values of  $\ln(v) < 0$  or  $\ln(v) > 0$  indicate whether the frequency of  
536 PAO1-mCherry increased ( $\ln(v) < 0$ ) or decreased ( $\ln(v) > 0$ ) relative to its  
competitor.

538

### Co-localization analysis

540 To determine the degree of co-localization of two different bacterial strains in  
the host, we transferred nematode worms to NGM plates seeded with a 1:1  
542 ratio mix of PAO1-gfp with either PAO1-mCherry, PAO1  $\Delta pvdD \Delta pchEF$ -  
mCherry, or PAO1  $\Delta lasR$ -mCherry. After a grazing time of 24 hours, we  
544 picked single worms and imaged both the mCherry- and the GFP channel,  
using the InCell Analyzer 2500HS microscope as described above. For image  
546 analysis, we straightened each worm using the *Straighten* plugin in Fiji (Kocsis  
et al., 1991). We then used Fiji to extract fluorescence intensity values for  
548 each pixel in the worm from tail ( $X = 0$ ) to head ( $X = 1$ ), in both channels  
(green = GFP, red = mCherry). To ensure that we only measure areas where  
550 bacteria were present, we restricted our analysis to the region of the worm gut,  
where the colonization of the worm takes place. We then calculated the

552 Spearman correlation coefficient between the two fluorescent signals, as a  
proxy for co-localization of the two strains using the statistical software  
554 RStudio (R Development Core Team, 2013).

### 556 **Statistical analysis**

All statistical analyses were performed in RStudio v. 3.3.0 (R Development  
558 Core Team, 2013). We used Pearson correlations to test for associations  
between PAO1-mCherry fluorescence intensities and (a) recovered bacteria  
560 from the gut; and (b) total bacterial load in mixed infections. We used analysis  
of variance (ANOVA) to compare fluorescence values between observation  
562 times, strains and for comparisons to non-fluorescent controls. P-values were  
corrected for multiple comparisons using the post-hoc Tukey HSD test. To  
564 compare promoter expression data between PAO1 WT and mutant strains,  
and to compare relative fitness values between competitors in the competition  
566 assay, we used Welch's two-sample t-test. Co-localization analysis was  
performed using the Spearman correlation coefficient between the intensity  
568 distribution of mCherry and GFP across the entire length of the worm. We  
tested for differences in co-localization between treatments using ANOVA.

570

### **Acknowledgments**

572 We thank the Center of Microscopy and Image Analysis (University of Zürich)  
for support with image acquisition and advice on image analysis.

574

### **Funding**



576 This work was funded by the Swiss National Science Foundation (grant no.  
PP00P3\_165835 to RK), the European Research Council (grant no. 681295 to  
578 RK), and a Swiss National Science Foundation post-doctoral fellowship (no.  
P2ZHP3\_174751 to EG).

580

### Competing Interests

582 The authors have no competing interests to declare.

### 584 References:

- Alibaud L, Köhler T, Coudray A, Prigent-Combaret C, Bergeret E, Perrin J,  
586 Benghezal M, Reimann C, Gauthier Y, Van Delden C, Attree I,  
Fauvarque MO, Cosson P. 2008. Pseudomonas aeruginosa virulence  
588 genes identified in a Dictyostelium host model. *Cell Microbiol* **10**:729–740.  
doi:10.1111/j.1462-5822.2007.01080.x
- 590 Allen RC, Popat R, Diggle SP, Brown SP. 2014. Targeting virulence: can we  
make evolution-proof drugs? *Nat Rev Microbiol* **12**:300–308.  
592 doi:10.1038/nrmicro3232
- Andersen SB, Ghoul M, Marvig RL, Lee Z-B, Molin S, Johansen HK, Griffin  
594 AS. 2018. Privatisation rescues function following loss of cooperation.  
*bioRxiv*. doi:10.1101/326165
- 596 Andersen SB, Marvig RL, Molin S, Krogh Johansen H, Griffin AS. 2015. Long-  
term social dynamics drive loss of function in pathogenic bacteria. *Proc*  
598 *Natl Acad Sci* **112**:10756–10761. doi:10.1073/pnas.1508324112
- André JB, Godelle B. 2005. Multicellular organization in bacteria as a target for  
600 drug therapy. *Ecol Lett* **8**:800–810. doi:10.1111/j.1461-0248.2005.00783.x
- Balasubramanian D, Schneper L, Kumari H, Mathee K. 2013. A dynamic and  
602 intricate regulatory network determines Pseudomonas aeruginosa  
virulence. *Nucleic Acids Res* **41**:1–20. doi:10.1093/nar/gks1039
- 604 Bao Y, Lies DP, Fu H, Roberts GP. 1991. An improved Tn7-based system for  
the single-copy insertion of cloned genes into chromosomes of gram-

- 606 negative bacteria. *Gene* **109**:167–168. doi:[https://doi.org/10.1016/0378-1119\(91\)90604-A](https://doi.org/10.1016/0378-1119(91)90604-A)
- 608 Becker KW, Skaar EP. 2014. Metal limitation and toxicity at the interface  
610 between host and pathogen. *FEMS Microbiol Rev.* doi:10.1111/1574-6976.12087
- Brown SP, West S a, Diggle SP, Griffin AS. 2009. Social evolution in micro-  
612 organisms and a Trojan horse approach to medical intervention  
strategies. *Philos Trans R Soc Lond B Biol Sci* **364**:3157–3168.  
614 doi:10.1098/rstb.2009.0055
- Buckling A, Brockhurst MA. 2008. Kin selection and the evolution of virulence.  
616 *Heredity (Edinb)* **100**:484–488. doi:10.1038/sj.hdy.6801093
- Cezairliyan B, Vinayavekhin N, Grenfell-Lee D, Yuen GJ, Saghatelian A,  
618 Ausubel FM. 2013. Identification of *Pseudomonas aeruginosa* phenazines  
that kill *Caenorhabditis elegans*. *PLoS Pathog* **9**:e1003101.  
620 doi:10.1371/journal.ppat.1003101
- Choi K-H, Schweizer HP. 2006. mini-Tn7 insertion in bacteria with single  
622 attTn7 sites: example *Pseudomonas aeruginosa*. *Nat Protoc* **1**:153–161.  
doi:10.1038/nprot.2006.24
- 624 Clatworthy AE, Pierson E, Hung DT. 2007. Targeting virulence: a new  
paradigm for antimicrobial therapy. *Nat Chem Biol* **3**:541–548.  
626 doi:10.1038/nchembio.2007.24
- Cornelis P, Dingemans J. 2013. *Pseudomonas aeruginosa* adapts its iron  
628 uptake strategies in function of the type of infections. *Front Cell Infect  
Microbiol* **3**:1–7. doi:10.3389/fcimb.2013.00075
- 630 Dandekar AA, Chugani S, Greenberg PE. 2012. Bacterial Quorum Sensing  
and Metabolic Incentives to Cooperate. *Science (80- )* **338**:264–266.  
632 doi:10.1126/science.1227289.
- Diggle SP, Griffin AS, Campbell GS, West S a. 2007. Cooperation and conflict  
634 in quorum-sensing bacterial populations. *Nature* **450**:411–414.  
doi:10.1038/nature06279
- 636 dos Santos M, Ghou M, West SA. 2018. Pleiotropy, cooperation and the  
social evolution of genetic architecture. *PLoS Biol* **16**:e2006671.  
638 doi:10.1371/journal.pbio.2006671

- Dumas Z, Ross-Gillespie A, Kümmerli R. 2013. Switching between apparently  
640 redundant iron-uptake mechanisms benefits bacteria in changeable  
environments. *Proc Biol Sci* **280**:20131055. doi:10.1098/rspb.2013.1055
- 642 Ewbank JJ. 2002. Tackling both sides of the host – pathogen equation with  
Caenorhabditis elegans **4**:247–256. doi:10.1016/S1286-4579(01)01531-3
- 644 Félix M-A, Braendle C. 2010. The natural history of Caenorhabditis elegans.  
*Curr Biol* **20**:R965–R969. doi:10.1016/J.CUB.2010.09.050
- 646 Feltner JB, Wolter DJ, Pope CE, Groleau M, Smalley NE, Greenberg EP.  
2016. LasR Variant Cystic Fibrosis Isolates Reveal an Adaptable  
648 Quorum- Sensing Hierarchy in Pseudomonas aeruginosa. *MBio*  
**7**:e01513-16. doi:10.1128/mBio.01513-16.
- 650 Flemming HC, Wingender J, Szewzyk U, Steinberg P, Rice SA, Kjelleberg S.  
2016. Biofilms: An emergent form of bacterial life. *Nat Rev Microbiol*  
652 **14**:563–575. doi:10.1038/nrmicro.2016.94
- Gerdt JP, Blackwell HE. 2014. Competition Studies Confirm Two Major  
654 Barriers That Can Preclude the Spread of Resistance to Quorum-Sensing  
Inhibitors in Bacteria. *ACS Chem Biol* **9**:2291–2299.  
656 doi:10.1021/cb5004288
- Ghoul M, Griffin AS, West SA. 2014. Toward an evolutionary definition of  
658 cheating. *Evolution (N Y)* **68**:318–331. doi:10.1111/evo.12266
- Granato ET, Harrison F, Kümmerli R, Ross-Gillespie A. 2016. Do Bacterial  
660 “Virulence Factors” Always Increase Virulence? A Meta-Analysis of  
Pyoverdine Production in Pseudomonas aeruginosa As a Test Case.  
662 *Front Microbiol* **7**:1952. doi:10.3389/fmicb.2016.01952
- Granato ET, Ziegenhain C, Marvig RL, Kümmerli R. 2018. Low spatial  
664 structure and selection against secreted virulence factors attenuates  
pathogenicity in Pseudomonas aeruginosa. *ISME J*. doi:10.1038/s41396-  
666 018-0231-9
- Griffin AS, West SA, Buckling A. 2004. Cooperation and competition in  
668 pathogenic bacteria. *Nature* **430**:1024–1027. doi:10.1038/nature02744
- Harrison F. 2013. Bacterial cooperation in the wild and in the clinic: Are  
670 pathogen social behaviours relevant outside the laboratory? *BioEssays*  
**35**:108–112. doi:10.1002/bies.201200154

- 672 Harrison F, Browning LE, Vos M, Buckling A. 2006. Cooperation and virulence  
in acute *Pseudomonas aeruginosa* infections. *BMC Biol.*  
674 doi:10.1186/1741-7007-4-21
- Harrison F, McNally A, Da Silva AC, Heeb S, Diggle SP. 2017. Optimised  
676 chronic infection models demonstrate that siderophore “cheating” in  
*Pseudomonas aeruginosa* is context specific. *ISME J* **11**:2492–2509.  
678 doi:10.1038/ismej.2017.103
- Henkel JS, Baldwin MR, Barbieri JT. 2010. Toxins from bacteria. *EXS* **100**:1–  
680 29. doi:10.1007/978-3-7643-8338-1\_1
- Imperi F, Tiburzi F, Visca P. 2009. Molecular basis of pyoverdine siderophore  
682 recycling in *Pseudomonas aeruginosa*. *Proc Natl Acad Sci* **106**:20440–  
20445. doi:10.1073/pnas.0908760106
- 684 Jansen G, Crummenerl LL, Gilbert F, Mohr T, Pfefferkorn R, Thänert R,  
Rosenstiel P, Schulenburg H. 2015. Evolutionary Transition From  
686 Pathogenicity To Commensalism: Global Regulator Mutations Mediate  
Fitness Gains Through Virulence Attenuation. *Mol Biol Evol* **32**:2883–  
688 2896. doi:10.1093/molbev/msv160
- Jiricny N, Diggle SP, West SA, Evans BA, Ballantyne G, Ross-Gillespie A,  
690 Griffin AS. 2010. Fitness correlates with the extent of cheating in a  
bacterium. *J Evol Biol* **23**:738–747. doi:10.1111/j.1420-  
692 9101.2010.01939.x
- Kirienko N V., Kirienko DR, Larkins-Ford J, Whlby C, Ruvkun G, Ausubel  
694 FM. 2013. *Pseudomonas aeruginosa* disrupts *Caenorhabditis elegans*  
iron homeostasis, causing a hypoxic response and death. *Cell Host*  
696 *Microbe* **13**:406–416. doi:10.1016/j.chom.2013.03.003
- Kocsis E, Trus BL, Steer CJ, Bisher ME, Steven AC. 1991. Image averaging of  
698 flexible fibrous macromolecules: the clathrin triskelion has an elastic  
proximal segment. *J Struct Biol* **107**:6–14. doi:10.1016/1047-  
700 8477(91)90025-R
- Köhler T, Buckling A, van Delden C. 2009. Cooperation and virulence of  
702 clinical *Pseudomonas aeruginosa* populations. *Proc Natl Acad Sci*  
**106**:6339–6344. doi:10.1073/pnas.0811741106
- 704 Kümmerli R, Brown SP. 2010. Molecular and regulatory properties of a public

- good shape the evolution of cooperation. *Proc Natl Acad Sci U S A*  
706 **107**:18921–6. doi:10.1073/pnas.1011154107
- Kümmerli R, Griffin AS, West S a, Buckling A, Harrison F. 2009a. Viscous  
708 medium promotes cooperation in the pathogenic bacterium *Pseudomonas*  
*aeruginosa*. *Proc Biol Sci* **276**:3531–3538. doi:10.1098/rspb.2009.0861
- 710 Kümmerli R, Jiricny N, Clarke LS, West SA, Griffin AS. 2009b. Phenotypic  
plasticity of a cooperative behaviour in bacteria. *J Evol Biol* **22**:589–598.  
712 doi:10.1111/j.1420-9101.2008.01666.x
- Kümmerli R, Santorelli LA, Granato ET, Dumas Z, Dobay A, Griffin AS, West  
714 SA. 2015. Co-evolutionary dynamics between public good producers and  
cheats in the bacterium *Pseudomonas aeruginosa*. *J Evol Biol* **28**:2264–  
716 74. doi:10.1111/jeb.12751
- Lee J, Zhang L. 2015. The hierarchy quorum sensing network in  
718 *Pseudomonas aeruginosa*. *Protein Cell* **6**:26–41. doi:10.1007/s13238-  
014-0100-x
- 720 Leggett HC, Brown SP, Reece SE. 2014. War and peace□: social interactions  
in infections. *Philos Trans R Soc B* **369**:20130365.  
722 doi:http://dx.doi.org/10.1098/rstb.2013.0365
- Lindsay RJ, Kershaw MJ, Pawlowska BJ, Talbot NJ, Gudelj I. 2016.  
724 Harboring public good mutants within a pathogen population can  
increase both fitness and virulence. *Elife* **5**:1–25. doi:10.7554/eLife.18678
- 726 Mahajan-Miklos S, Tan MW, Rahme LG, Ausubel FM. 1999. Molecular  
mechanisms of bacterial virulence elucidated using a *Pseudomonas*  
728 *aeruginosa*-*Caenorhabditis elegans* pathogenesis model. *Cell* **96**:47–56.  
doi:10.1016/S0092-8674(00)80958-7
- 730 Mellbye B, Schuster M. 2011. The sociomicrobiology of antivirulence drug  
resistance: a proof of concept. *MBio* **2**:e00131-11.  
732 doi:10.1128/mBio.00131-11
- Meyer JM, Neely A, Stintzi A, Georges C, Holder IA. 1996. Pyoverdinin is  
734 essential for virulence of *Pseudomonas aeruginosa*. *Infect Immun*  
**64**:518–523.
- 736 Nadal Jimenez P, Koch G, Thompson J a., Xavier KB, Cool RH, Quax WJ.  
2012. The Multiple Signaling Systems Regulating Virulence in

- 738 *Pseudomonas aeruginosa*. *Microbiol Mol Biol Rev* **76**:46–65.  
doi:10.1128/MMBR.05007-11
- 740 O'Brien S, Luján AM, Paterson S, Cant MA, Buckling A. 2017. Adaptation to  
public goods cheats in *Pseudomonas aeruginosa*. *Proc R Soc B Biol Sci*  
742 **284**:20171089. doi:10.1098/rspb.2017.1089
- Özkaya Ö, Balbontín R, Gordo I, Xavier KB. 2018. Cheating on Cheaters  
744 Stabilizes Cooperation in *Pseudomonas aeruginosa*. *Curr Biol* **26**:2070–  
2080. doi:10.1016/j.cub.2018.04.093
- 746 Papaioannou E, Utari P, Quax W. 2013. Choosing an Appropriate Infection  
Model to Study Quorum Sensing Inhibition in *Pseudomonas* Infections. *Int*  
748 *J Mol Sci* **14**:19309–19340. doi:10.3390/ijms140919309
- Papaioannou E, Wahjudi M, Nadal-Jimenez P, Koch G, Setroikromo R, Quax  
750 WJ. 2009. Quorum-quenching acylase reduces the virulence of  
*Pseudomonas aeruginosa* in a *Caenorhabditis elegans* infection model.  
752 *Antimicrob Agents Chemother*. doi:10.1128/AAC.00380-09
- Parrow NL, Fleming RE, Minnick MF. 2013. Sequestration and scavenging of  
754 iron in infection. *Infect Immun*. doi:10.1128/IAI.00602-13
- Pepper JW. 2012. Drugs that target pathogen public goods are robust against  
756 evolved drug resistance. *Evol Appl* **5**:757–761. doi:10.1111/j.1752-  
4571.2012.00254.x
- 758 Pollitt EJG, West SA, Crusz SA, Burton-Chellew MN, Diggle SP. 2014.  
Cooperation, quorum sensing, and evolution of virulence in  
760 *Staphylococcus aureus*. *Infect Immun* **82**:1045–1051.  
doi:10.1128/IAI.01216-13
- 762 Popat R, Crusz S a., Messina M, Williams P, West S a., Diggle SP. 2012.  
Quorum-sensing and cheating in bacterial biofilms. *Proc R Soc B Biol Sci*  
764 **279**:4765–4771. doi:10.1098/rspb.2012.1976
- Portal-Celhay C, Bradley ER, Blaser MJ. 2012. Control of intestinal bacterial  
766 proliferation in regulation of lifespan in *Caenorhabditis elegans*. *BMC*  
*Microbiol* **12**:49. doi:10.1186/1471-2180-12-49
- 768 Portman DS. 2006. Profiling *C. elegans* gene expression with DNA  
microarrays In: Community TC *elegans*. R, editor. WormBook: The Online  
770 Review of *C. Elegans* Biology. WormBook.

- 772 Preibisch S, Saalfeld S, Tomancak P. 2009. Globally optimal stitching of tiled  
3D microscopic image acquisitions. *Bioinformatics* **25**:1463–1465.  
doi:10.1093/bioinformatics/btp184
- 774 Priefer UB, Simon R, Pühler A. 1985. Extension of the Host Range of  
Escherichia coli Vectors by Incorporation of RSF1010 Replication and  
776 Mobilization Functions. *J Bacteriol* 324–330.
- 778 Pukkila-Worley R, Ausubel FM. 2012. Immune defense mechanisms in the  
Caenorhabditis elegans intestinal epithelium. *Curr Opin Immunol* **24**:3–9.  
doi:10.1016/j.coi.2011.10.004
- 780 R Development Core Team. 2013. R: A language and environment for  
statistical computing. R Foundation for Statistical Computing. Vienna,  
782 Austria.
- 784 Rahme LG, Stevens EJ, Wolfort SF, Shao J, Tompkins RG, Ausubel FM.  
1995. Common virulence factors for bacterial pathogenicity in plants and  
animals. *Science (80- )* **268**:1899–902. doi:10.1126/science.7604262
- 786 Rasko DA, Sperandio V. 2010. Anti-virulence strategies to combat bacteria-  
mediated disease. *Nat Rev Drug Discov* **9**:117–128. doi:10.1038/nrd3013
- 788 Raymond B, West SA, Griffin AS, Bonsall MB. 2012. The dynamics of  
cooperative bacterial virulence in the field. *Science (80- )* **337**:85–88.  
790 doi:10.1126/science.1218196
- 792 Rezzoagli C, Wilson D, Weigert M, Wyder S, Kümmerli R. 2018. Probing the  
evolutionary robustness of two repurposed drugs targeting iron uptake in  
*Pseudomonas aeruginosa*. *Evol Med Public Heal* **1**:246–259.  
794 doi:10.1093/emph/eoy026
- 796 Ross-Gillespie A, Dumas Z, Kümmerli R. 2015. Evolutionary dynamics of  
interlinked public goods traits: An experimental study of siderophore  
production in *Pseudomonas aeruginosa*. *J Evol Biol* **28**:29–39.  
798 doi:10.1111/jeb.12559
- 800 Ross-Gillespie A, Gardner A, Buckling A, West SA, Griffin AS. 2009. Density  
dependence and cooperation: theory and a test with bacteria. *Evolution*  
**63**:2315–2325. doi:10.1111/j.1558-5646.2009.00723.x
- 802 Ross-Gillespie A, Gardner A, West SA, Griffin AS. 2007. Frequency  
dependence and cooperation: theory and a test with bacteria. *Am Nat*

- 804           **170**:331–342. doi:10.1086/519860
- Ross-Gillespie A, Weigert M, Brown SP, Kümmerli R. 2014. Gallium-mediated  
806           siderophore quenching as an evolutionarily robust antibacterial treatment.  
*Evol Med Public Heal* **2014**:18–29. doi:10.1093/emph/eou003
- 808           Rumbaugh KP, Diggle SP, Watters CM, Ross-Gillespie A, Griffin AS, West SA.  
2009. Quorum Sensing and the Social Evolution of Bacterial Virulence.  
810           *Curr Biol* **19**:341–345. doi:10.1016/J.CUB.2009.01.050
- Rumbaugh KP, Trivedi U, Watters C, Burton-Chellew MN, Diggle SP, West  
812           SA. 2012. Kin selection, quorum sensing and virulence in pathogenic  
bacteria. *Proc R Soc B Biol Sci* **279**:3584–3588.  
814           doi:10.1098/rspb.2012.0843
- Sandoz KM, Mitzimberg SM, Schuster M. 2007. Social cheating in  
816           *Pseudomonas aeruginosa* quorum sensing. *Proc Natl Acad Sci U S A*  
**104**:15876–81. doi:10.1073/pnas.0705653104
- 818           Schindelin J, Arganda-Carreras I, Frise E, Kaynig V, Longair M, Pietzsch T,  
Preibisch S, Rueden C, Saalfeld S, Schmid B, Tinevez J-Y, White DJ,  
820           Hartenstein V, Eliceiri K, Tomancak P, Cardona A. 2012. Fiji: an open-  
source platform for biological-image analysis. *Nat Methods* **9**:676–82.  
822           doi:10.1038/nmeth.2019
- Scholz RL, Greenberg EP. 2015. Sociality in *Escherichia coli*: Enterochelin Is  
824           a Private Good at Low Cell Density and Can Be Shared at High Cell  
Density. *J Bacteriol* **197**:2122–2128. doi:10.1128/JB.02596-14.
- 826           Smith RS, Iglewski BH. 2003. *P. aeruginosa* quorum-sensing systems and  
virulence. *Curr Opin Microbiol* **6**:56–60. doi:10.1016/S1369-  
828           5274(03)00008-0
- Sommer C, Strähle C, Köthe U, Hamprecht FA. 2011. ilastik: Interactive  
830           Learning and Segmentation Toolkit.Eighth IEEE International Symposium  
on Biomedical Imaging (ISBI). Proceedings. pp. 230–233.
- 832           Stiernagle T. 2006. Maintenance of *C. elegans*. In: The *C.elegans* Research  
Community, editor. WormBook: The Online Review of *C. Elegans* Biology.
- 834           Takase H, Nitanaï H, Hoshino K, Otani T. 2000. Impact of Siderophore  
Production on *Pseudomonas aeruginosa* Infections in Immunosuppressed  
836           Mice. *Infect Immun* **68**:1834–1839. doi:10.1128/IAI.68.4.1834-1839.2000



- 838 Tan MW, Ausubel FM. 2000. *Caenorhabditis elegans*: A model genetic host to  
study *Pseudomonas aeruginosa* pathogenesis. *Curr Opin Microbiol* **3**:29–  
34. doi:10.1016/S1369-5274(99)00047-8
- 840 Tan MW, Mahajan-Miklos S, Ausubel FM. 1999. Killing of *Caenorhabditis*  
*elegans* by *Pseudomonas aeruginosa* used to model mammalian bacterial  
842 pathogenesis. *Proc Natl Acad Sci U S A* **96**:715–20.  
doi:10.1073/pnas.96.2.715
- 844 Utari PD, Quax WJ. 2013. *Caenorhabditis elegans* reveals novel  
*Pseudomonas aeruginosa* virulence mechanism. *Trends Microbiol*  
846 **21**:315–316. doi:10.1016/j.tim.2013.04.006
- Van Gestel J, Weissing FJ, Kuipers OP, Kovács ÁT. 2014. Density of founder  
848 cells affects spatial pattern formation and cooperation in *Bacillus subtilis*  
biofilms. *ISME J* **8**:2069–2079. doi:10.1038/ismej.2014.52
- 850 Vega NM, Gore J, Janczyk M, Dale R, Freeman J, Casadei G. 2017.  
Stochastic assembly produces heterogeneous communities in the  
852 *Caenorhabditis elegans* intestine. *PLOS Biol* **15**:e2000633.  
doi:10.1371/journal.pbio.2000633
- 854 Weigert M, Kümmerli R. 2017. The physical boundaries of public goods  
cooperation between surface-attached bacterial cells. *Proc R Soc B Biol*  
856 *Sci* **284**:20170631. doi:10.1098/rspb.2017.0631
- West SA, Buckling A. 2003. Cooperation, virulence and siderophore  
858 production in bacterial parasites. *Proc R Soc Lond B* **270**:37–44.  
doi:10.1098/rspb.2002.2209
- 860 West SA, Diggle SP, Buckling A, Gardner A, Griffin AS. 2007. The Social  
Lives of Microbes. *Annu Rev Ecol Evol Syst* **38**:53–77.  
862 doi:10.1146/annurev.ecolsys.38.091206.095740
- Wu HJ, Wang AHJ, Jennings MP. 2008. Discovery of virulence factors of  
864 pathogenic bacteria. *Curr Opin Chem Biol* **12**:93–101.  
doi:10.1016/j.cbpa.2008.01.023
- 866 Zaborin A, Romanowski K, Gerdes S, Holbrook C, Lepine F, Long J, Poroyko  
V, Diggle SP, Wilke A, Righetti K, Morozova I, Babrowski T, Liu DC,  
868 Zaborina O, Alverdy JC. 2009. Red death in *Caenorhabditis elegans*  
caused by *Pseudomonas aeruginosa* PAO1. *Proc Natl Acad Sci*

- 870           **106**:6327–32. doi:10.1073/pnas.0813199106
- Zhou L, Slamti L, Nielsen-LeRoux C, Lereclus D, Raymond B. 2014. The
- 872           Social Biology of Quorum Sensing in a Naturalistic Host Pathogen
- System. *Curr Biol* **24**:2417–2422. doi:10.1016/J.CUB.2014.08.049
- 874           Zhu J, Cai X, Harris TL, Gooyit M, Wood M, Lardy M, Janda KD. 2015.
- Disarming pseudomonas aeruginosa virulence factor lasb by leveraging a
- 876           caenorhabditis elegans infection model. *Chem Biol* **22**:483–491.
- doi:10.1016/j.chembiol.2015.03.012
- 878

## Figure captions

880 **Figure 1. Quantifying *P. aeruginosa* infections in the *C. elegans* gut.** (A)  
Experimental procedure: we used fluorescently tagged *P. aeruginosa* strains  
882 to examine bacterial colonization of the *C. elegans* gut. Per experiment, we  
exposed approximately 200 *C. elegans* nematodes to a lawn of mCherry-  
884 tagged PAO1 strains for 24 hours. Subsequently, nematodes were removed  
from the bacterial plate, surface washed and collected in sterile buffer for  
886 monitoring. After 0, 6, or 30 hours post exposure (hpe), approximately 30  
nematodes were immobilized and transferred to microscopy slides for imaging.  
888 (B) Brightfield and fluorescence channel merged image depicting mCherry-  
fluorescent bacteria inside the host gut. (C) Bacterial load inside the nematode  
890 was quantified as the sum of fluorescence intensity across pixels in the region  
of interest “ROI” (yellow outline) and standardised by total worm area. (D)  
892 Colonization dynamics of the wildtype strain PAO1-mCherry: immediately after  
removal from the exposure plate (0 hpe), worms showed high bacterial loads  
894 inside their guts. Bacterial load first declined when the worms were kept in  
buffer for 6 hours, but then remained constant for the next 24 hours. Grey  
896 shaded area indicates background fluorescence (mean +/- standard deviation)  
of worms exposed to the non-fluorescent, non-pathogenic *E.coli* OP50. N =  
898 number of worms from four independent experiments. \*\*\* =  $p < 0.001$ , n.s. =  
not statistically significant.

900

**Figure 2. *P. aeruginosa* expresses genes for pyoverdine synthesis and**  
902 **quorum sensing regulators in the host gut.** To quantify the expression of  
virulence factor genes inside hosts, worms were exposed to four PAO1  
904 strains, each containing a promoter::mCherry fusion for either *pvdA*  
(pyoverdine synthesis), *pchEF* (pyochelin synthesis), *lasR* or *rhIR* (quorum  
906 sensing regulators). With the exception of *pchEF*, all genes were significantly  
expressed in the host, both at 0 and 30 hpe. Expression levels were  
908 standardised for bacterial load. Grey shaded areas depict background  
fluorescence (mean +/- standard deviation) of worms exposed to the non-  
910 fluorescent, non-pathogenic *E.coli* OP50. N = number of worms from four

independent experiments. \* =  $p < 0.05$ ; \*\* =  $p < 0.01$ , \*\*\* =  $p < 0.001$ , n.s. = not  
912 statistically significant.

914 **Figure 3. *P. aeruginosa* can switch between siderophores, while quorum  
sensing regulators act hierarchically.** Because virulence traits are linked at  
916 the regulatory level, we measured gene expression of each trait in the  
negative background of the co-regulated trait. (A) The expression of the  
918 pyoverdine synthetic gene *pvdA* is significantly expressed in the wildtype and  
the pyochelin-negative background, but slightly reduced in the latter. (B) The  
920 pyochelin synthetic gene *pchEF* is significantly expressed in the pyoverdine-  
negative background, but silent in the wildtype. (C) The expression of the QS-  
922 regulator gene *lasR* is unchanged in the Rhl-negative background compared  
to the wildtype. (D) The expression of the QS-regulator gene *rhIR* is reduced in  
924 the Las-negative background. Expression levels were standardised for  
bacterial load. Grey shaded areas depict background fluorescence (mean +/-  
926 standard deviation) of worms exposed to the non-fluorescent, non-pathogenic  
*E.coli* OP50. N = number of worms from four independent experiments. \* =  $p <$   
928 0.05; \*\* =  $p < 0.01$ , \*\*\* =  $p < 0.001$ , n.s. = not statistically significant.

930 **Figure 4. Virulence factor production affects bacterial uptake and host  
colonization ability** (A) Bacterial load inside *C. elegans* guts measured  
932 immediately after the recovery of worms from the exposure plates (0 hours  
post exposure; hpe). Comparisons across isogenic PAO1 mutant strains, each  
934 deficient for the production of one or two virulence factors, reveal that the two  
quorum-sensing mutants PAO1  $\Delta lasR$  and PAO1  $\Delta rhIR$  reached lower  
936 bacterial densities than the wildtype. (B) Comparison of the relative  
colonization success of strains (ratio of bacterial loads at 0 hpe versus 30 hpe)  
938 revealed that the siderophore-negative strain PAO1  $\Delta pvdD\Delta pchEF$  showed  
significantly reduced ability to remain in the host compared to the wildtype. In  
940 contrast, the colonisation success of PAO1  $\Delta pchEF$  and PAO1  $\Delta rhIR$  was  
increased relative to the wildtype. Grey shaded areas depict background  
942 fluorescence (mean +/- standard deviation) of worms exposed to the non-  
fluorescent, non-pathogenic *E.coli* OP50. N = number of worms from four

944 independent experiments. \* =  $p < 0.05$ ; \*\* =  $p < 0.01$ , \*\*\* =  $p < 0.001$ .

946 **Figure 5. Mixed infections reveal social strain dynamics but no**  
**successful cheating** (A) Relative fitness of the wildtype PAO1-mCherry after  
948 42 hours of competition inside the *C. elegans* gut against an untagged PAO1  
control strain (white circles); the siderophore-negative strain PAO1  
950  $\Delta pvdD\Delta pchEF$  (green diamonds); and the Las-negative strain PAO1  $\Delta lasR$   
(blue squares). The control competition revealed a mild but significant  
952 negative effect of the mCherry tag on wildtype fitness. When accounting for  
these mCherry costs, we found that the putative cheat strains PAO1  $\Delta lasR$   
954 and PAO1  $\Delta pvdD\Delta pchEF$  performed equally well compared to the wildtype,  
but could not outcompete it. This suggests that virulence factor deficient  
956 strains benefit from the presence of non-producers but cannot successfully  
cheat on them. (B) At 6 hpe, wildtype frequency in mixed infections correlated  
958 positively with total bacterial load inside hosts in competition with PAO1  $\Delta lasR$   
(blue line) and PAO1  $\Delta pvdD\Delta pchEF$  (green line) but not in the control  
960 competition (grey line). (C) These correlations disappeared at 48 hpe. Each  
data point represents an individual worm. Data stems from three independent  
962 experiments, with 8 replicates each.

964 **Figure 6. Spatial structure of mixed infections in the nematode gut.** (A, B)  
Illustrative examples of *C. elegans* individuals infected with a mixture of GFP-  
966 and mCherry-labelled strains. Each worm was computationally straightened  
and fluorescence intensity values were extracted for each pixel from tail ( $X=0$ )  
968 to head ( $X=1$ ). We then calculated the Spearman correlation coefficient  
between the intensity values in the two fluorescence channels across pixels,  
970 as our estimate of strain colocalization. Examples show worms with high (A)  
and low (B) degrees of colocalization. (C) Patterns of colocalization levels  
972 varied substantially between individuals, but did not differ across strain  
combinations ( $p = 0.119$ : wildtype PAO1-mCherry versus: (i) wildtype PAO1-  
974 gfp (white circles), (ii) PAO1  $\Delta pvdD\Delta pchEF$ -mCherry (green diamonds) or (iii)  
PAO1  $\Delta lasR$ -mCherry (blue squares). Each data point represents an individual  
976 worm. Data stems from 3 independent experiments, with 12 replicates each.

978 **Supplementary Figures captions**

980 **Supplementary Figure S1. Fluorescence intensity significantly correlates**  
982 **with live bacteria inside the host gut.** To assess the relationship between  
984 fluorescence signal and bacterial load inside *C. elegans*, colonized nematodes  
986 were observed using fluorescence microscopy and disrupted to extract live  
988 bacteria from the gut. Fluorescence intensity significantly correlated with the  
990 number of bacteria present in the host gut. (A) The correlation was moderate  
992 when the worms were observed immediately after exposure (0 hours post  
exposure; hpe) (Pearson correlation coefficient  $r = 0.496$ ; test for association  
between paired samples  $t_{28} = 3.02$ ,  $p = 0.0053$ ). (B) At 6 hpe, fluorescence  
intensity correlated more strongly with bacterial load in the host gut (Pearson  
correlation coefficient  $r = 0.713$ ; test for association between paired samples  
 $t_{23} = 4.88$ ,  $p < 0.0001$ ). In total, 65 worms were observed in two independent  
experiments. Fluorescence intensity values were blank corrected, using  
worms infected with the untagged strain PAO1 as non-fluorescent controls.

994 **Supplementary Figure S2. Survival assay of worms infected with various**  
***P. aeruginosa* strains.** After washing worms off the exposure plates, we  
996 estimated host survival over 48 hours. For this purpose, we observed 50 to 90  
worms and checked for viability every 24 hours by prodding them with a  
998 platinum wire three times. Worms were considered dead if they no longer  
moved upon stimulation with the wire. We found no significant difference in  
1000 the survival rate between any of the strains compared to the food strain *E.coli*  
OP50-I (linear model,  $F_{6,210} = 0.60$ ,  $p = 0.7296$ ). However, we found a small  
1002 but significant difference in the survival of worms colonized by the three  
siderophore-mutants, which was higher compared to the survival of worms  
1004 exposed to PAO1 (Tukey's range test,  $p = 0.0213$  for PAO1  $\Delta pchEF$ ,  $p =$   
 $0.0054$  for PAO1  $\Delta pvdD$  and  $p = 0.0062$  for PAO1  $\Delta pvdD\Delta pchEF$ ). Data  
1006 points depict average survival across three independent experiments. In each  
experiment, we had three replicates for each strain. Gray areas represent the  
1008 standard error of the mean.

1010 **Supplementary Figure S3. Bacterial load declines at 6 hours post**  
1012 **exposure (hpe).** We kept infected nematodes in sterile buffer and determined  
1014 the fluorescence intensity in the host gut, reflecting the number of bacteria that  
1016 managed to colonize the worms at 6 hpe. When scaled to the bacterial load at  
1018 0 hpe, we found that all strains showed a significant reduction in bacterial load.  
Moreover, the siderophore-negative strain PAO1  $\Delta pvdD \Delta pchEF$  showed  
1016 significantly reduced ability to remain in the host compared to PAO1 (ANOVA  
with post-hoc Tukey test,  $t_{888} = -2.25$ ,  $p = 0.0025$ ). For each individual strain,  
1018 relative fluorescence is expressed as fluorescence intensity at 6 hpe scaled for  
the intensity at 0 hpe.

1020

**Supplementary Figure S4. Growth of *P. aeruginosa* WT and mutant**  
1022 **strains for social traits on NGM plates.** To assess the growth ability of  
PAO1 and the mutant strains on NGM plates, after 24 hours of incubation at  
1024 25°C, we collected the bacterial lawn in sterile NaCl solution and the OD600  
was measured as proxy for cell growth. We found no statistically significant  
1026 difference between strains (linear model  $F_{5,60} = 2.27$ ,  $p = 0.0588$ ). Data is  
shown as mean across four independent experiments, with three replicates  
1028 (i.e. plates) per strain for each experiment. Error bars denote the standard  
error of the mean.

1030

**Supplementary Figure S5. Interaction between social traits inside the**  
1032 **host at 30 hours post exposure.** We compared the expression of promoter  
fusions inserted either in the wildtype PAO1 or in mutant strains, which lack  
1034 either the second siderophore (light grey boxplot) or the second QS-regulator  
(white bars), at 30 hpe. Although values are generally lower, we observed the  
1036 same trend as in Figure 3. Values are corrected for cell density. N = number of  
worms tested. Error bars represent standard errors of the mean. Grey shaded  
1038 areas indicate the non-fluorescent background (mean  $\pm$  standard deviation).  
\*\*\* =  $p < 0.001$  and n.s. = not statistically significant, based on Welch's 2-  
1040 sample t-test between PAO1 and the respective mutant strain.

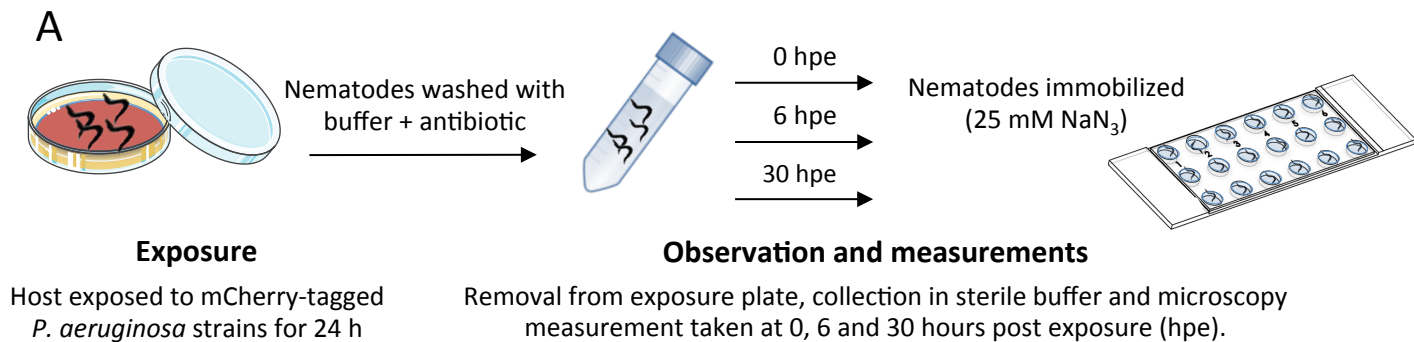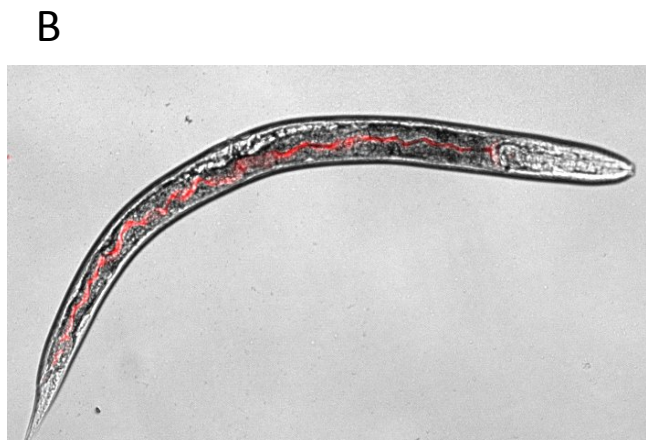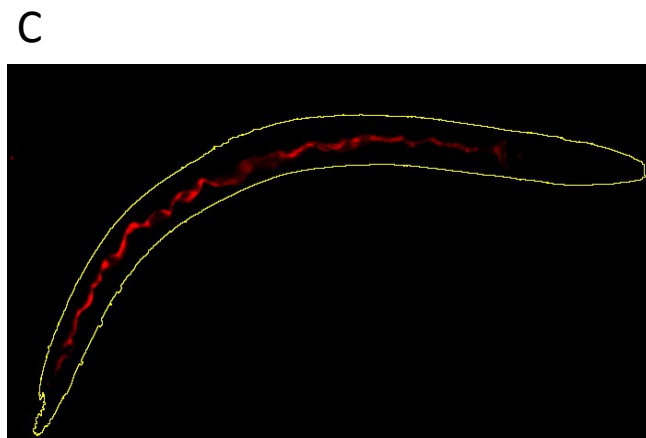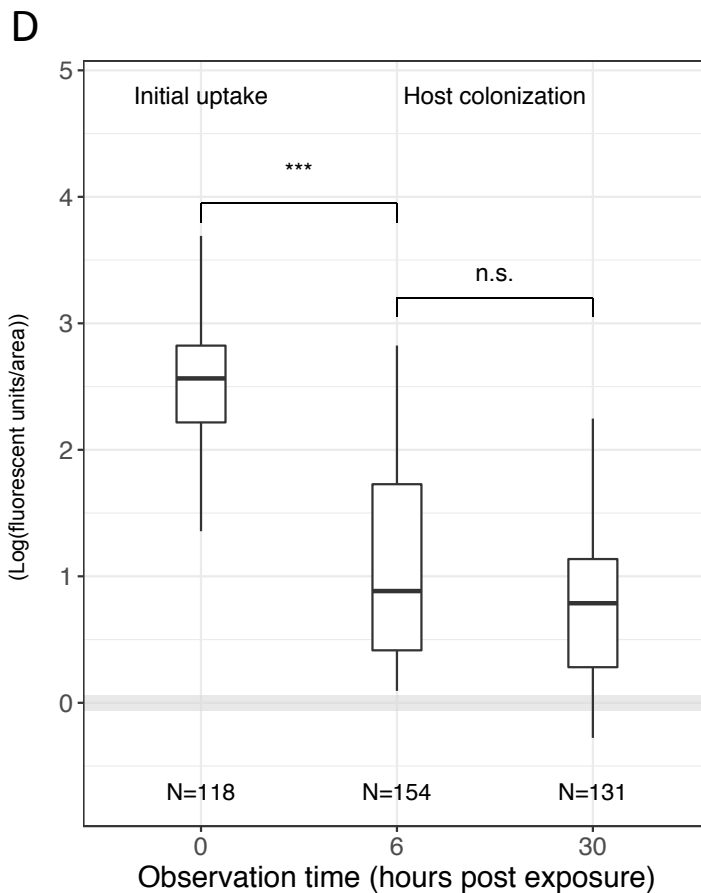



A

**pvdA::mCherry**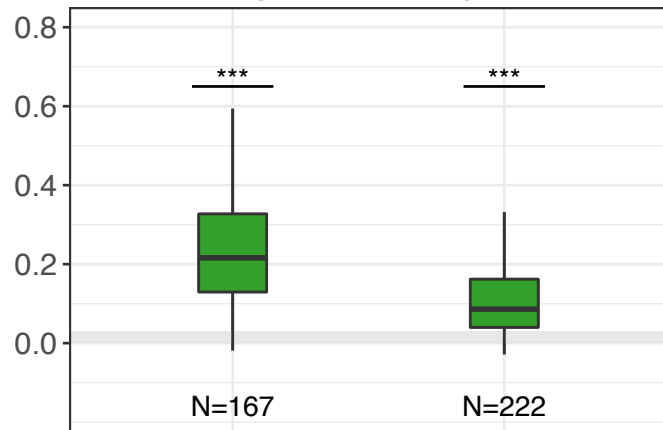

B

**pchEF::mCherry**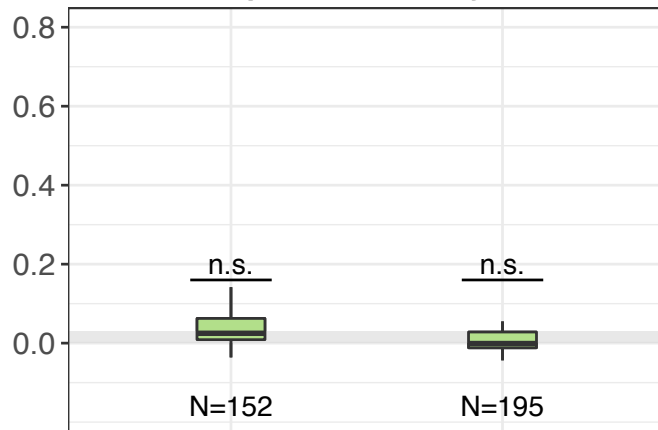

C

**lasR::mCherry**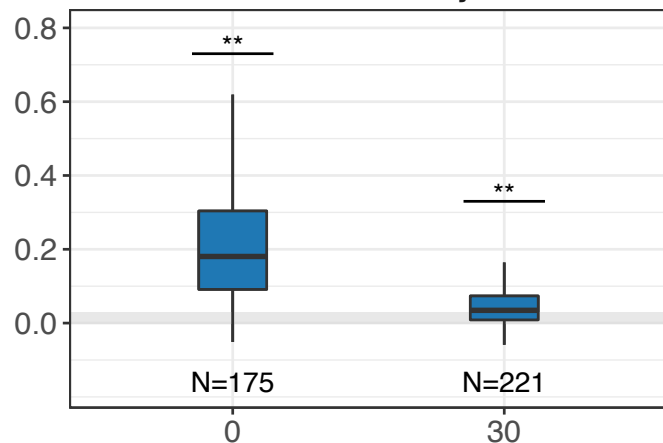

D

**rhIR::mCherry**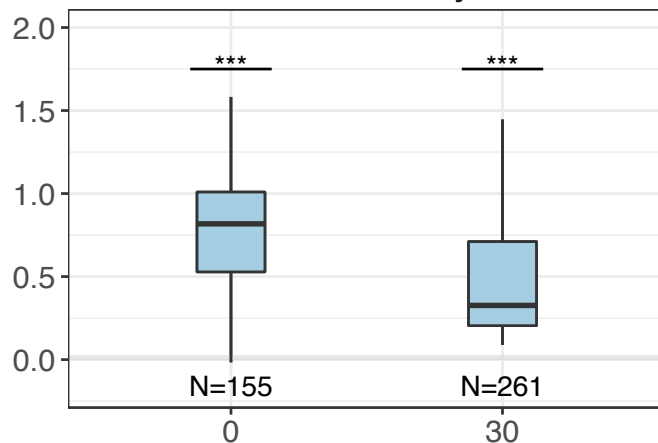

Observation time (hours post exposure)

A

**pvdA::mCherry**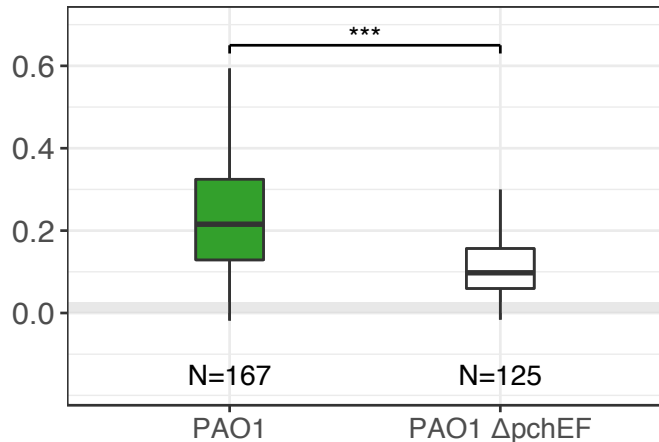

B

**pchEF::mCherry**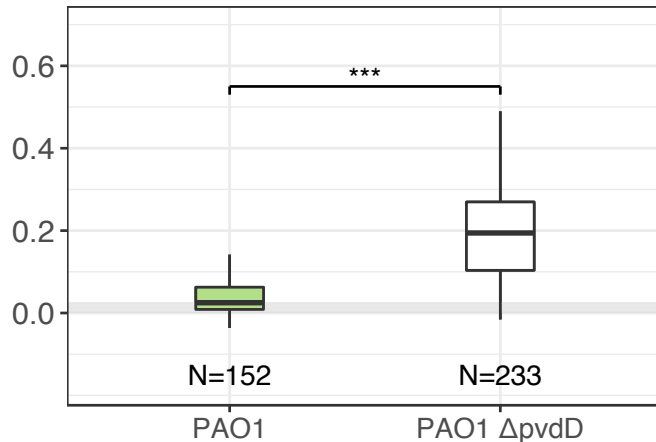

C

**lasR::mCherry**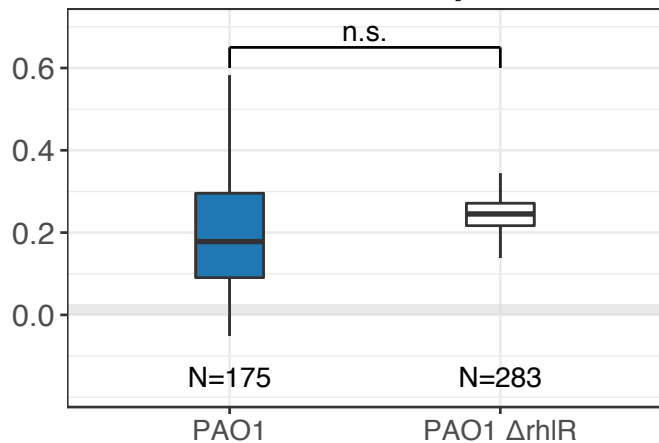

D

**rhIR::mCherry**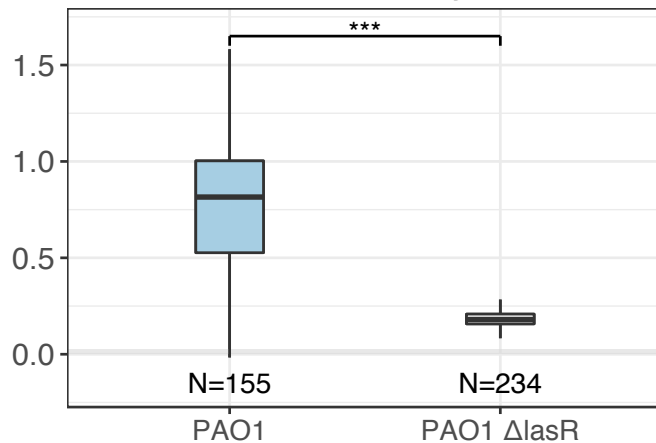

Strain

**A**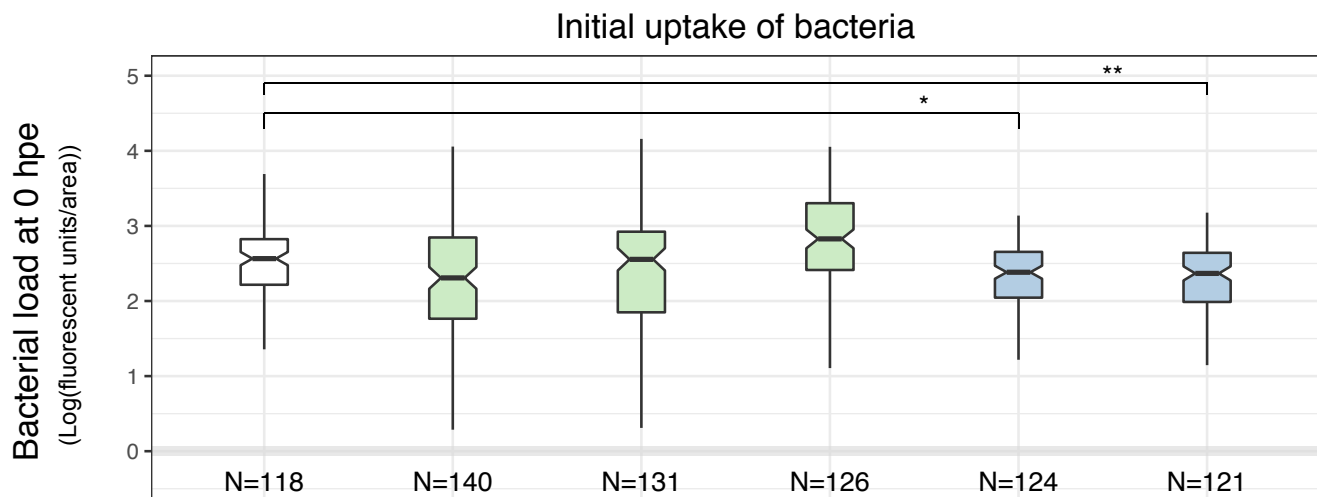**B**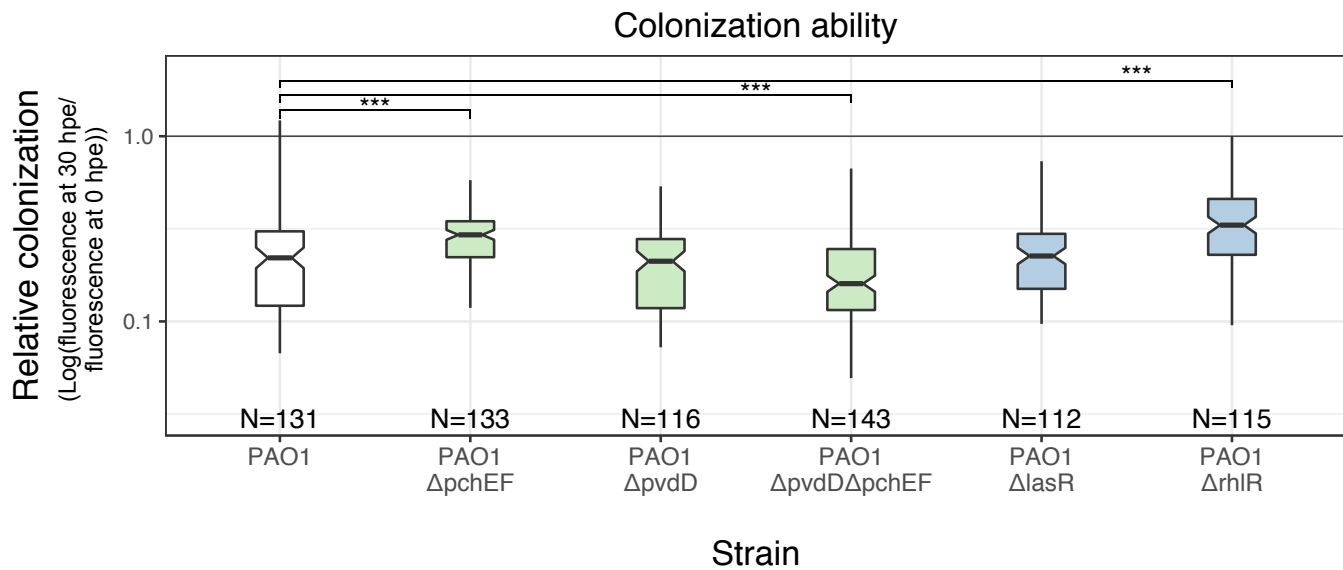

Strain type    PAO1    Siderophore mutants    QS mutants

**A**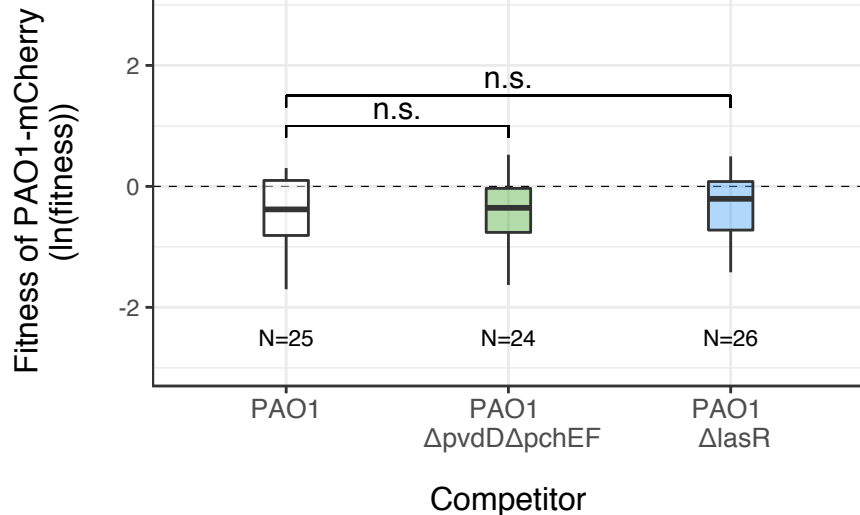**B**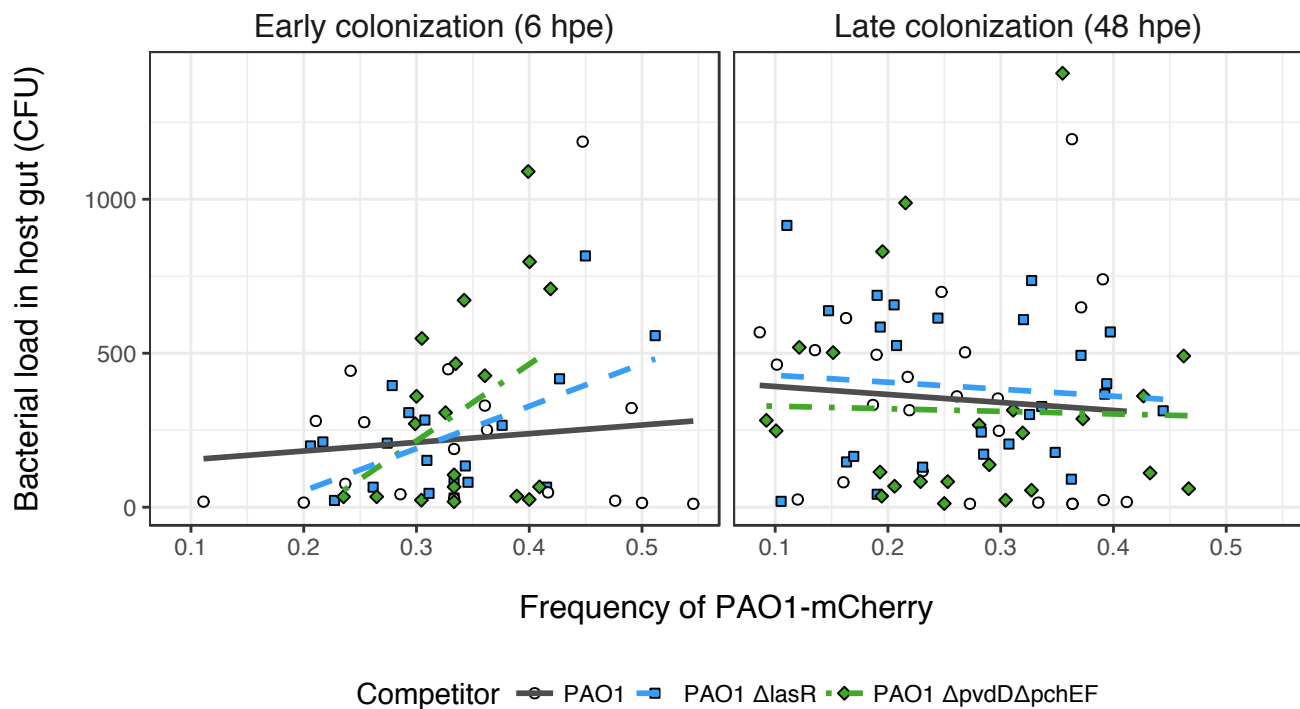

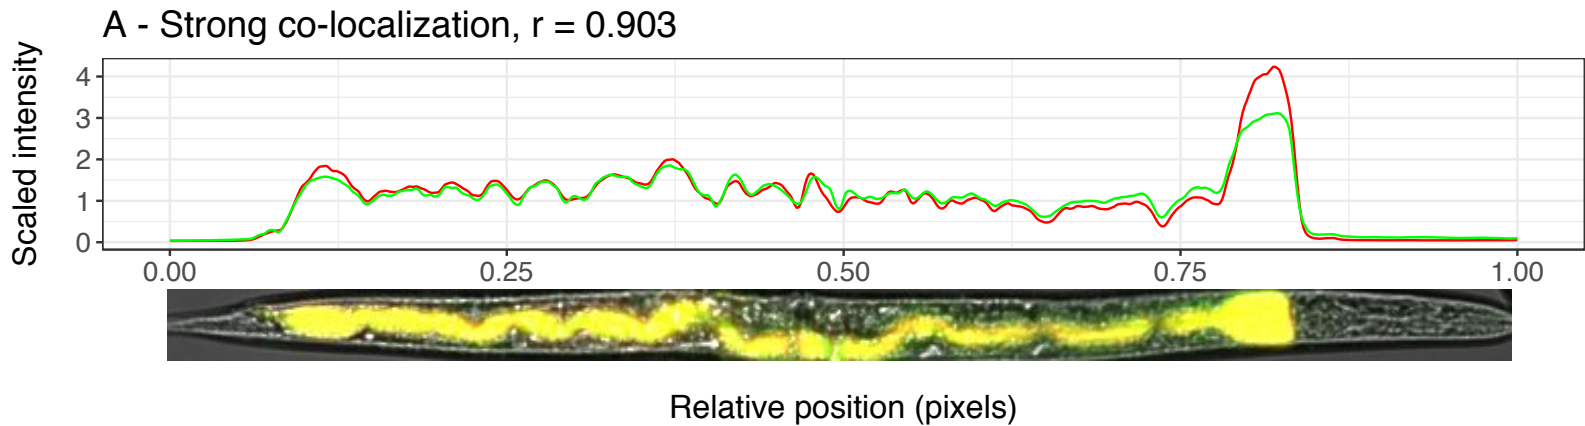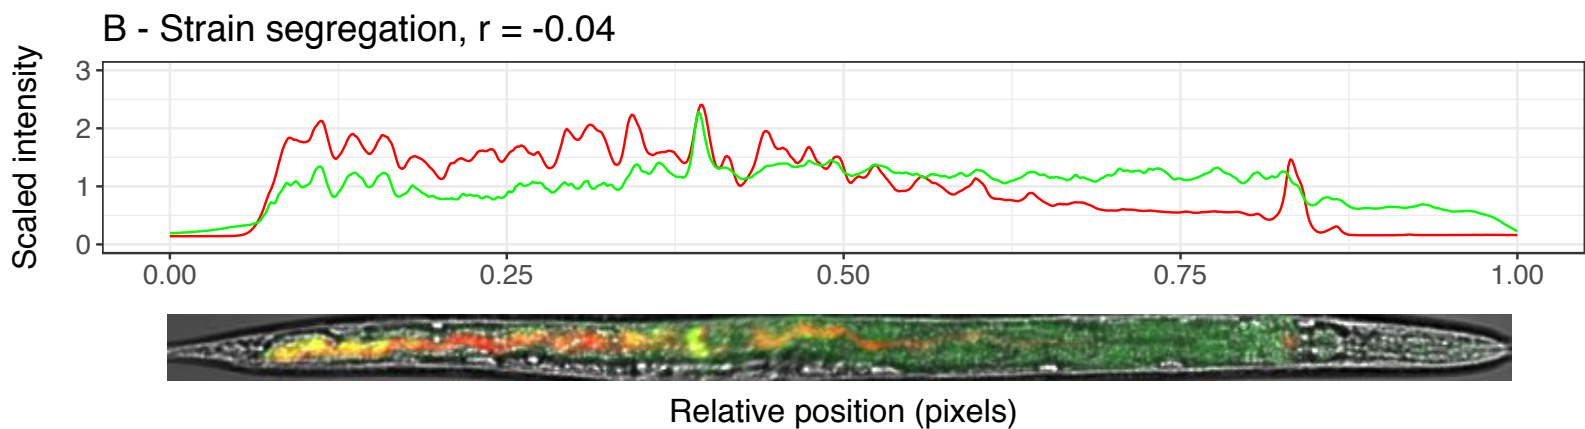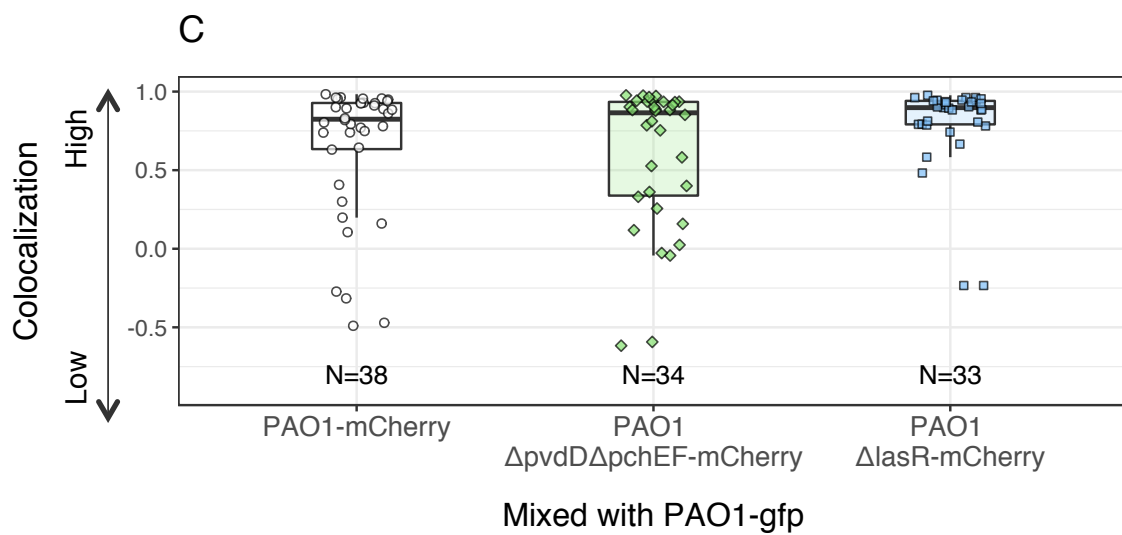

Source: http://biorxiv.org/content/10.1101/488262v1.full.pdf
