1 ***In vivo* microscopy reveals the impact of *Pseudomonas aeruginosa***  
2 **social interactions on host colonization**

3 Chiara Rezzoagli<sup>1,2\*</sup>, Elisa T. Granato<sup>3</sup>, Rolf Kümmerli<sup>1,2\*</sup>

4 <sup>1</sup>Department of Plant and Microbial Biology, University of Zurich, Zurich,  
5 Switzerland

6 <sup>2</sup>Department of Quantitative Biomedicine, University of Zurich, Zurich,  
7 Switzerland

8 <sup>3</sup>Department of Zoology, University of Oxford, Oxford, United Kingdom

9

10 Running title: Bacterial social dynamics and host colonization

11

12 \* Corresponding authors:

13 Chiara Rezzoagli or Rolf Kümmerli, Department of Quantitative Biomedicine,  
14 University of Zurich, Winterthurerstrasse 190, 8057 Zurich, Switzerland.

15 Email: chiara.rezzoagli@uzh.ch (CR), rolf.kuemmerli@uzh.ch (RK).

16 Phone: +41 44 635 48 01.

17

18 Conflict of interest: The authors declare no conflict of interest.

19 **Abstract**

20 Pathogenic bacteria engage in social interactions to colonize hosts, which  
21 include quorum-sensing-mediated communication and the secretion of  
22 virulence factors that can be shared as “public goods” between individuals.  
23 While *in-vitro* studies demonstrated that cooperative individuals can be  
24 displaced by “cheating” mutants freeriding on social acts, we know less about  
25 social interactions in infections. Here, we developed a live imaging system to  
26 track virulence factor expression and social strain interactions in the human  
27 pathogen *Pseudomonas aeruginosa* colonizing the gut of *Caenorhabditis*  
28 *elegans*. We found that shareable siderophores and quorum-sensing systems  
29 are expressed during infections, affect host gut colonization, and benefit non-  
30 producers. However, non-producers were unable to cheat and outcompete  
31 producers. Our results indicate that the limited success of cheats is due to a  
32 combination of the down-regulation of virulence factors over the course of the  
33 infection, the fact that each virulence factor examined contributed to but was  
34 not essential for host colonization, and the potential for negative-frequency  
35 dependent selection. Our findings shed new light on bacterial social  
36 interactions in infections and reveal potential limits of therapeutic approaches  
37 that aim to capitalize on social dynamics between strains for infection control.

## 38 **Introduction**

39 During infections, pathogenic bacteria secrete a wide range of extracellular  
40 virulence factors to colonize and grow inside the host [1, 2]. Secreted  
41 molecules include siderophores for iron scavenging, signaling molecules for  
42 quorum sensing (QS), toxins to attack host cells, and matrix compounds for  
43 biofilm formation [3–6]. *In-vitro* studies have shown that extracellular virulence  
44 factors can be shared as “public goods” between cells, and thereby benefit  
45 individuals other than the producing cell [7–9]. There has been enormous  
46 interest in understanding how this form of bacterial cooperation can be  
47 evolutionarily stable since secreted public goods can be exploited by non-  
48 cooperative mutants called “cheats”, which do not engage in cooperation yet  
49 still benefit from the molecules produced by others [10–12].

50

51 There is increasing evidence that social interactions and cooperator-cheat  
52 dynamics might also matter within hosts [9, 13, 14]. For instance, in controlled  
53 infection experiments engineered non-producers, deficient for the production  
54 of specific virulence factors, could outcompete producers and thereby reduce  
55 virulence [15–19], but in other cases the success of non-producers was  
56 compromised [20, 21]. Other studies have followed chronic human infections  
57 within patients over time and reported that virulence-factor-negative mutants  
58 emerge and spread, with the mutational patterns suggesting cooperator-cheat  
59 dynamics [7, 22, 23]. These findings spurred ideas of how social interactions  
60 within hosts could be manipulated for therapeutic purposes [14, 24, 25].  
61 Suggested approaches include: inducing cooperator-cheat dynamics to steer  
62 infections towards lower virulence [7, 26]; introducing less virulent strains with

63 medically beneficial alleles into established infections [24]; and targeting  
64 secreted virulence factors to control infections and constrain the evolution of  
65 resistance [25, 27–31].

66

67 However, all these approaches explicitly rely on the assumption that the social  
68 traits of interest are: (i) expressed inside hosts; (ii) important for host  
69 colonization; (iii) exploitable; and (iv) induce cooperator-cheat dynamics as  
70 observed *in vitro* [9] – assumptions that have not yet been tested in real time  
71 inside living hosts. Here, we explicitly test the importance of bacterial social  
72 interactions within hosts by using *in-vivo* fluorescence microscopy to monitor  
73 bacterial virulence factor production, host colonization and strain interactions,  
74 using the opportunistic pathogen *Pseudomonas aeruginosa* and its nematode  
75 model host *Caenorhabditis elegans* [32–34].

76

77 *C. elegans* naturally preys on bacteria [35]. While most bacteria are killed  
78 during ingestion, a small fraction of cells survives [36], which can, in the case  
79 of pathogenic bacteria, establish an infection in the gut [37]. *P. aeruginosa*  
80 deploys an arsenal of virulence factors that facilitate successful host  
81 colonization [38]. For example, the two siderophores pyoverdine and pyochelin  
82 scavenge host-bound iron during acute infections to enable pathogen growth  
83 [6, 39–41]. *P. aeruginosa* further secretes the protease elastase, the toxin  
84 pyocyanin, and rhamnolipid biosurfactants to attack host tissue [7, 42, 43].  
85 Production of these latter virulence factors only occurs at high cell densities  
86 and is controlled by the Las and the Rhl QS-systems [44]. Because both QS-

87 regulated virulence factors and siderophores were shown to be involved in *C.*  
88 *elegans* killing [37, 45–48], we used them as focal traits for our study.

89

90 To tackle our questions, we first conducted experiments with fluorescently  
91 tagged *P. aeruginosa* bacteria (PAO1) to follow infection dynamics, from the  
92 first uptake through feeding up to a progressed state of gut infection. We then  
93 constructed promoter-reporter fusions for genes involved in the synthesis of  
94 the two siderophores (pyoverdine and pyochelin) and the two QS-regulators  
95 (LasR and RhIR) to track *in vivo* virulence factor gene expression during host  
96 colonization. Subsequently, we used mutant strains deficient for virulence  
97 factors to determine whether they show compromised colonization abilities.  
98 Finally, we followed mixed infections of wildtype and mutants over time to  
99 determine the extent of strain co-localization in the gut, and to test whether  
100 secreted virulence factors are indeed exploitable by non-producers in the host.

101

## 102 **Material and methods**

### 103 **Strain and bacterial growth conditions**

104 Bacterial strains, primers and plasmids used in this study are listed in the  
105 Supplementary Tables S1-S3. Details on strain construction are given in the  
106 Supplementary Methods. For all experiments, overnight cultures were grown  
107 in 8 ml Lysogeny broth (LB) in 50 ml tubes, incubated at 37°C, 220 rpm for 18  
108 hours, washed with 0.8% NaCl solution and adjusted them to OD<sub>600</sub> = 1.  
109 Nematode Growth Media (NGM) plates [0.25% Peptone, 50 mM NaCl, 25mM  
110 [PO<sub>4</sub><sup>-</sup>], 5 µg/ml Cholesterol, 1mM CaCl<sub>2</sub>, 1mM MgSO<sub>4</sub> supplemented with  
111 1.5% agar, 6 cm diameter] were seeded with 50 µl of bacterial culture and

112 incubated at 25°C for 24 hours. All *P. aeruginosa* strains used in this study  
113 showed equal growth on NGM exposure plates (Supplementary Figure S1).  
114 Peptone was purchased from BD Biosciences, Switzerland, all other  
115 chemicals from Sigma Aldrich, Switzerland.

116

### 117 **Nematode culture**

118 We used the temperature-sensitive, reproductively sterile *C. elegans* strain  
119 JK509 (*glp-1(q231)* III). This strain reproduces at 16°C, but does not develop  
120 gonads and is therefore sterile at 25°C. Worms were maintained fertile at 16°C  
121 on High Growth Media (HGM) agar plates (2% Peptone, 50 mM NaCl, 25mM  
122 [PO<sub>4</sub>], 20 µg/ml Cholesterol, 1mM CaCl<sub>2</sub>, 1mM MgSO<sub>4</sub>) seeded with the  
123 standard food source *E. coli* strain OP50 [49]. For age synchronization, plates  
124 were washed with sterile distilled water and adult worms were killed with  
125 hypochlorite-sodium hydroxide solution to isolate eggs [49]. Eggs were placed  
126 in M9 buffer (20 mM KH<sub>2</sub>PO<sub>4</sub>, 40 mM Na<sub>2</sub>HPO<sub>4</sub>, 80 mM NaCl, 1 mM MgSO<sub>4</sub>)  
127 and incubated at 16°C for 16-18 hours to hatch. Then, L1 larvae were  
128 transferred to OP50-seeded HGM plates and incubated at 25°C for 28 hours  
129 to reach L4 developmental stage. Worms and OP50 bacteria were provided by  
130 the Caenorhabditis Genetic Center (CGC), which is supported by the National  
131 Institutes of Health - Office of Research Infrastructure Programs (P40  
132 OD010440).

133

### 134 ***C. elegans* infection protocol**

135 Synchronized L4 worms were washed from HGM plates with M9 buffer + 50  
136 µg/ml kanamycin (M9-Kan), and washed three times with M9-Kan for worm

137 surface-disinfection. Viable worms were further separated from any debris by  
138 sucrose flotation [50] and rinsed three time in M9 buffer to remove sucrose.  
139 The worm handling protocol for the main experiments is depicted in Figure 1A.  
140 Specifically, approximately 200 worms were moved to seeded NGM plates  
141 and incubated for 24 hours at 25°C. After this period of exposure to  
142 pathogens, infected worms were extensively washed with M9 buffer + 50  
143 µg/ml chloramphenicol (M9-Cm) followed by M9 buffer, subsequently  
144 transferred to individual wells of a 6-well plate filled with sterile M9 buffer + 5  
145 µg/ml cholesterol (M9+Ch Buffer) where they were kept up to 48 hours post  
146 exposure (hpe) and imaged after 0, 6 and 30 hpe.

147

#### 148 **Nematode survival assay**

149 Our goal was to observe infections inside living hosts. To verify that worms  
150 stayed alive during the experiment (up to 48 hpe), we tracked the survival of  
151 infected population (50-90 worms) in M9-Ch buffer. Worms were observed for  
152 motility at 0, 24 and 48 hpe, by prodding them with a platinum wire. Worms  
153 were considered dead when they no longer responded to touches. Each  
154 bacterial strain was tested in three replicates and three independent  
155 experiments were carried out. We used *E. coli* OP50 as a negative control for  
156 killing. During this observation period, worms experienced only negligible  
157 killing by the colonizing bacteria, and we found no significant difference in  
158 killing between the non-pathogenic *E. coli* food strain and the *P. aeruginosa*  
159 strains (Supplementary Figure S2).

160

#### 161 **Microscopy setup and imaging**

162 For microscopy, we picked individual worms from the M9+Ch buffer and  
163 paralyzed them with 25 mM sodium azide before transferring them to an 18-  
164 well  $\mu$ -slide (Ibidi, Germany). All experiments were carried out at the Center for  
165 Microscope and Image Analysis of the University Zürich (ZMB). For the  
166 colonization experiment, images were acquired on a Leica LX inverted  
167 widefield light microscope system with Leica-TX2 filter cube for mCherry  
168 (emission:  $560 \pm 40$  nm, excitation:  $645 \pm 75$  nm, DM = 595) and Leica-DFC-  
169 350-FX, cooled fluorescence monochrome camera (resolution:  $1392 \times 1040$   
170 pixels) for image recording (16-bit color depth). For gene expression  
171 experiments, microscopy was performed on the InCell Analyzer 2500HS (GE  
172 Healthcare) automated imaging system, using polychroic beam splitter  
173 BGRFR\_2 (for mCherry, excitation:  $575 \pm 25$  nm, emission:  $607.5 \pm 19$  nm)  
174 and PCO – sCMOS camera (resolution:  $2048 \times 2048$  pixels, 16-bit).

175

### 176 **Image processing and analysis**

177 To extract fluorescence measurements from individual worms, images were  
178 segmented into objects and background, using an automated image  
179 segmentation workflow with *ilastik* software [51]. Segmented images were  
180 then imported in *Fiji* [52] to determine the fluorescence intensity (as “Raw  
181 Integrated Density”, i.e. the sum of pixels values in the selection) and area of  
182 each worm. Images obtained from the InCell microscope entailed 64 frames  
183 ( $8 \times 8$  grid) with 10% overlap. These frames were stitched together using a  
184 macro-automated version of the Stitching plugin in *Fiji* [53] prior to  
185 segmentation and analysis. To correct for background and host-tissue  
186 autofluorescence, we imaged, at each time point, worms infected with non-



187 fluorescent strains (i.e. OP50 or PAO1), and used the mean intensity of these  
188 control infections to subtract background fluorescence values from worms  
189 infected with fluorescent strains.

190

### 191 **Competition assay in the host**

192 For *in-vivo* competitions between PAO1-*mCherry* and PAO1 $\Delta$ *pvdD* $\Delta$ *pchEF* or  
193 PAO1 $\Delta$ *lasR*, overnight monocultures were washed twice with 0.8% NaCl  
194 solution, adjusted to OD<sub>600</sub> = 1 and mixed at a 1:1 ratio. To control for fitness  
195 effects of the mCherry marker, we also competed PAO1-*mCherry* against the  
196 untagged PAO1. NGM plates were then seeded with 50  $\mu$ l of mixed culture  
197 and incubated at 25°C for 24 hours. Worms were exposed to the mix for 24  
198 hours and then recovered as previously described. After 6 and 48 hours post-  
199 exposure, individual worms were picked, immobilized with sodium azide and  
200 washed for 5 minutes with M9 + 0.003% NaOCl. Worms were washed twice  
201 with M9 buffer. We then transferred each individual worm to a 1.5 ml screw-  
202 cap micro tube (Sarstedt, Switzerland) containing sterilized glass beads (1 mm  
203 diameter, Sigma Aldrich). Worms were disrupted using a bead-beater  
204 (TissueLyser II, QIAGEN, Germany), shaking at 30 Hz for 1.5 min before  
205 flipping the tubes and shaking for an additional 1.5 min to ensure even  
206 disruption (adapted from [54]). Tubes were then centrifuged at 2000 x g for 2  
207 min, the content was re-suspended in 200  $\mu$ l of 0.8% NaCl and plated on two  
208 LB 1.2 % agar plates for each sample. Plates were incubated overnight at  
209 37°C and left at room temperature for another 24 h to allow the fluorescent  
210 marker to fully mature. We then distinguished between fluorescent and non-  
211 fluorescent colonies using a custom built fluorescence imaging device (*Infinity*

212 3 camera, Lumenera, Canada). We then calculated the relative fitness of  
213 PAO1-*mCherry* as  $\ln(v) = \ln\left\{\frac{a_{48} \times (1 - a_6)}{a_6 \times (1 - a_{48})}\right\}$ , where  $a_6$  and  $a_{48}$  are the  
214 frequency of PAO1-*mCherry* at 6 and 48 hours after recovery, respectively  
215 [55]. Values of  $\ln(v) < 0$  or  $\ln(v) > 0$  indicate whether the frequency of PAO1-  
216 *mCherry* increased ( $\ln(v) < 0$ ) or decreased ( $\ln(v) > 0$ ) relative to its competitor.

217

### 218 **Co-localization analysis**

219 To determine the degree of co-localization of two different bacterial strains in  
220 the host, we transferred nematodes to NGM plates seeded with a 1:1 mix of  
221 PAO1-*gfp* with either PAO1-*mCherry*, PAO1 $\Delta$ *pvdD* $\Delta$ *pchEF*-*mCherry*, or  
222 PAO1 $\Delta$ *lasR*-*mCherry*. After a 24 hours grazing period, we picked single  
223 worms and imaged both mCherry- and GFP channels, using the InCell  
224 Analyzer 2500HS microscope. We used *Fiji* to straighten each worm with the  
225 *Straighten* plugin [56], and extracted fluorescence intensity values in the GFP  
226 and mCherry channels for each pixel from tail ( $X = 0$ ) to head ( $X = 1$ ) of the  
227 worm. To ensure that we only measure areas where bacteria were present, we  
228 restricted our analysis to the region of the worm gut, where bacterial  
229 colonization takes place. We then calculated Spearman correlation coefficients  
230 between the fluorescent signals, as a proxy for strain co-localization using  
231 RStudio v. 3.3.0 [57].

232

### 233 **Statistical analysis**

234 All statistical analyses were performed with RStudio. We used Pearson  
235 correlations to test for associations between PAO1-*mCherry* fluorescence  
236 intensities and (a) recovered bacteria from the gut; and (b) total bacterial load

237 in mixed infections. We used analysis of variance (ANOVA) to compare  
238 fluorescence values between observation times, strains and for comparisons  
239 to non-fluorescent controls. *P*-values were corrected for multiple comparisons  
240 using the post-hoc Tukey HSD test. To compare promoter expression data  
241 between PAO1 WT and mutant strains, and to compare relative fitness values  
242 between competitors in the competition assay, we used Welch's two-sample *t*-  
243 test. To measure co-localization, we calculated the Spearman correlation  
244 coefficient  $\rho$  between the intensity of mCherry and GFP signals across the  
245 worm gut, and used ANOVA to test for differences between treatments.

246

## 247 **Results**

### 248 **PAO1 colonization dynamics in the *C. elegans* gut**

249 For all infection experiments, we followed the protocol depicted in Figure 1A-  
250 C. We first exposed worms to *P. aeruginosa* for 24 hours on NGM plates.  
251 Subsequently, worms were removed, washed, and treated with antibiotics to  
252 kill external bacteria. We then imaged infected worms under the microscope at  
253 different time points and quantified bacterial density and gene expression  
254 using fluorescent mCherry markers. We first confirmed that mCherry  
255 fluorescence is a suitable proxy for the number of live bacteria in *C. elegans*,  
256 by comparing fluorescence intensities in whole worms (Figure 1B) to the  
257 number of live bacteria recovered from the worms' gut. Fluorescence intensity  
258 values positively correlated with the bacterial load inside the nematodes, both  
259 immediately after recovering the worms from the exposure plates and at 6  
260 hours post exposure (hpe; Supplementary Figure S3, Pearson correlation  
261 coefficient at 0 hpe:  $r = 0.49$ ,  $t_{28} = 3.02$ ,  $p = 0.0053$ ; at 6 hpe:  $r = 0.713$ ,  $t_{23} =$

262 4.88,  $p < 0.0001$ ). As our goal was to image infections in living hosts, we  
263 further confirmed that worms stayed alive during the observation period  
264 (Supplementary Figure S2).

265

266 When following host colonization by PAO1-*mCherry* over time, we observed  
267 that immediately after removal from the exposure plate, worms carried large  
268 amounts of bacteria in their gut (Figure 1D). Subsequently, bacterial load  
269 significantly declined when worms were kept in buffer for 6 hours (ANOVA:  $t_{391}$   
270 = -8.55,  $p < 0.001$ ) and then remained constant for the next 24 hours ( $t_{391}$  =  
271 0.61,  $p = 0.529$ ). This pattern suggests that a large number of bacteria are  
272 taken up during the feeding phase, followed by the shedding of a high  
273 proportion of cells, leaving behind a fraction of live bacteria that establishes an  
274 infection and colonizes the worm gut.

275

### 276 **PAO1 expresses siderophore biosynthesis genes and QS regulators in** 277 **the host**

278 We then examined whether genes involved in the synthesis of pyoverdine  
279 (*pvdA*) and pyochelin (*pchEF*), and the genes encoding the QS-regulators  
280 *lasR* and *rhIR*, are expressed inside hosts. Worms were exposed to four  
281 different PAO1 strains, each carrying a specific promoter-*mCherry* fusion.  
282 Imaging after the initial uptake phase (0 hpe) revealed that, with the exception  
283 of *pchEF*, all genes were significantly expressed in the host (Figure 2;  
284 ANOVA, comparisons to the non-fluorescent control, for *pvdA*:  $t_{754} = 4.23$ ,  $p <$   
285  $0.001$ ; for *pchEF*:  $t_{754} = 0.74$ ,  $p = 0.461$ ; for *lasR*:  $t_{754} = 2.96$ ,  $p = 0.003$ ; for  
286 *rhIR*:  $t_{754} = 10.37$ ,  $p < 0.001$ ). Although fluorescence intensity declined over

287 time (linear model,  $F_{1,1795} = 48.98$ ,  $p < 0.001$ ), we observed that apart from  
288 *pchEF*, all genes were still significantly expressed during the subsequent  
289 colonisation of the host at 30 hpe. (Figure 2; ANOVA, for *pvdA*:  $t_{754} = 4.87$ ,  $p <$   
290  $0.001$ ; for *pchEF*:  $t_{754} = 0.684$ ,  $p = 0.461$ ; for *lasR*:  $t_{754} = 3.01$ ,  $p = 0.003$ ; for  
291 *rhIR*:  $t_{754} = 16.68$ ,  $p < 0.001$ ).

292

### 293 **Regulatory links between social traits operate inside the host**

294 We know that regulatory links exist between the virulence traits studied here.  
295 While pyoverdine synthesis suppresses pyochelin production under stringent  
296 iron limitation [58], the Las-QS system positively activates the Rhl-QS system  
297 [44]. To test whether these links operate inside the host, we measured gene  
298 expression of each trait in the negative background of the co-regulated trait  
299 (Figure 3). For *pvdA*, we observed significant gene expression levels in both  
300 the wildtype PAO1 and the pyochelin-deficient PAO1 $\Delta$ *pchEF* strain (Figure  
301 3A), albeit the overall expression was slightly reduced in PAO1 $\Delta$ *pchEF* (t-test,  
302  $t_{253} = 8.67$ ,  $p < 0.001$ ). For *pchEF*, expression patterns confirm the  
303 suppressive nature of pyoverdine: the pyochelin synthesis gene was not  
304 expressed in the wildtype but significantly upregulated in the pyoverdine-  
305 deficient PAO1 $\Delta$ *pvdD* strain (Figure 3B;  $t_{296} = -19.68$ ,  $p < 0.001$ ). For *lasR*, we  
306 found that gene expression was not significantly different in wildtype PAO1  
307 compared to the Rhl-negative mutant PAO1 $\Delta$ *rhIR*, confirming that the Las-QS  
308 system is at the top of the hierarchy and not influenced by the Rhl-system  
309 (Figure 3C;  $t_{211} = -1.50$ ,  $p = 0.136$ ). Conversely, the expression of *rhIR* was  
310 strongly dependent on a functional Las-system, and therefore only expressed  
311 in PAO1, but repressed in the Las-negative mutant PAO1 $\Delta$ *lasR* (Figure 3D;

312  $t_{156} = 19.04$ ,  $p < 0.001$ ). These results show that (i) iron-limitation is strong in  
313 *C. elegans* as PAO1 primarily invests in the more potent siderophore  
314 pyoverdine; (ii) pyochelin can have compensatory effects when pyoverdine is  
315 lacking; and (iii) the loss of the Las-system leads to the concomitant collapse  
316 of the Rhl-system.

317

### 318 **Virulence-factor-negative mutants show trait-specific deficiencies in host** 319 **colonization**

320 To examine whether the ability to produce shared virulence factors is  
321 important for initial bacterial uptake and host colonization, we exposed  
322 *C. elegans* to five isogenic mutants of PAO1-*mCherry*, either impaired in the  
323 production of pyoverdine ( $\Delta pvdD$ ), pyochelin ( $\Delta pchEF$ ), both siderophores  
324 ( $\Delta pvdD\Delta pchEF$ ), the QS receptor LasR ( $\Delta lasR$ ), or the QS receptor RhlR  
325 ( $\Delta rhIR$ ). After the feeding phase, the bacterial load of the wildtype and all three  
326 siderophores mutants were equally abundant inside hosts, whereas bacterial  
327 load was significantly reduced for the two QS-mutants compared to the  
328 wildtype (Figure 4A; ANOVA, significant variation among strains  $F_{5,736} = 10.50$ ,  
329  $p < 0.001$ ; post-hoc Tukey test for multiple comparisons:  $p > 0.05$  for all  
330 siderophore mutants,  $p = 0.021$  for PAO1 $\Delta lasR$ ,  $p < 0.001$  for PAO1 $\Delta rhIR$ ).

331

332 As previously described for PAO1 colonization (Figure 1D), we observed that  
333 the bacterial load of all strains declined at 6 hpe (Supplementary Figure S4)  
334 and 30 hpe (Figure 4B) following worm removal from the exposure plates. This  
335 decline was significantly more pronounced for the double-siderophore  
336 knockout PAO1 $\Delta pvdD\Delta pchEF$  than for the wildtype (Figure 4B; ANOVA, post-

337 hoc Tukey test  $p < 0.001$ ). In contrast, mutants deficient in pyochelin  
338 ( $PAO1\Delta pchEF$ ) and RhIR ( $PAO1\Delta rhIR$ ) production showed a significantly  
339 higher ability to remain in the host than the wildtype (Figure 4B; ANOVA, post-  
340 hoc Tukey test  $p < 0.001$  for both strains). Taken together, our findings suggest  
341 that the two siderophores can complement each other, and that only the  
342 siderophore double mutant and the LasR-deficient strain have an overall  
343 disadvantage in colonizing worms.

344

345 **Mixed communities are formed inside hosts, but exploitation of social**  
346 **traits is constrained**

347 Given our findings on colonization deficiencies, we reasoned that the  
348 siderophore-double mutant ( $PAO1\Delta pvdD\Delta pchEF$ ) and the Las-deficient  
349 mutant ( $PAO1\Delta lasR$ ) could act as cheats and benefit from the exploitation of  
350 virulence factors produced by the wildtype in mixed infections. To test this  
351 hypothesis, we first competed the  $PAO1-mCherry$  strain against the untagged  
352 wildtype in the host, and found that the mCherry tag had a small negative  
353 effect on PAO1 fitness (Figure 5A; one sample t-test,  $t_{24} = -4.12$ ,  $p < 0.001$ ).  
354 We then competed  $PAO1-mCherry$  against the two putative cheats and found  
355 that neither of them could gain a significant fitness advantage over the  
356 wildtype, but also did not lose out (Figure 5A; ANOVA,  $F_{2,70} = 0.517$ ,  $p =$   
357  $0.598$ ). These results indicate that virulence-factor-negative mutants, initially  
358 compromised in host colonization, can indeed benefit from the presence of the  
359 wildtype producer, but not to an extent that would allow them to increase in  
360 frequency and displace producers.

361

362 Since our mono-infection experiments showed that the wildtype can maintain  
363 higher bacterial loads in the worms compared to the two mutants (Figure 4B),  
364 we hypothesized that worms, which have initially taken up higher frequencies  
365 of the wildtype relative to the mutant should carry increased bacterial loads in  
366 the gut. We found this prediction to hold true at 6 hpe in mixed infections with  
367 the two non-producers, but not in the control mixed infections with the  
368 untagged wildtype (Figure 5B, 6hpe; Pearson correlation coefficient, for mixed  
369 infection with PAO1 $\Delta$ lasR:  $r = 0.54$ ,  $t_{17} = 2.67$ ,  $p = 0.016$ ; with  
370 PAO1 $\Delta$ pvdD $\Delta$ pchEF:  $r = 0.40$ ,  $t_{17} = 1.77$ ,  $p = 0.031$ ; with control PAO1:  $r =$   
371  $0.12$ ,  $t_{17} = 0.47$ ,  $p = 0.639$ ). These correlations disappeared at the later  
372 colonization stage (Figure 5B, 48 hpe; Pearson correlation coefficient  $r < 0$ ,  $p$   
373  $> 0.05$  for all strains). The loss of these correlations indicates that rare  
374 producers experienced a selective advantage during competition and  
375 increased in relative frequency, while common producers might have lost and  
376 decreased in frequency.

377

378 **Strain co-localization is generally high within the host, but varies**  
379 **substantially across individuals**

380 *In-vitro* studies have shown that spatial proximity of cells is crucial for efficient  
381 compound sharing [59, 60]. We thus assessed the co-localization of strains in  
382 mixed infections inside the gut (Figure 6). We found that all worms were  
383 colonized by both strains, and that the level of co-localization  $\rho$  (from tail to  
384 head) was generally high, although it varied substantially across individuals  
385 (Figure 6A-B). Similar co-localization patterns emerged for all three strain  
386 combinations tested, highlighting that the type of competitor did not influence



387 the degree of strain co-localization in the host gut (Figure 6C; ANOVA,  $F_{2,102} =$   
388 2.17,  $p = 0.119$ ). While our measure of co-localization has some limitations as  
389 it does not reveal physical proximity at the single cell level, and is based on a  
390 2D projection of a 3D organ, it clearly suggests that competing cells are close  
391 to one another, and that social interactions could occur between them.

392

### 393 **Discussion**

394 We developed a live imaging system that allows us to track host colonization  
395 by pathogenic bacteria (*P. aeruginosa*) and their expression of virulence  
396 factors inside hosts (*C. elegans*). We used this system to focus on the role of  
397 secreted virulence factors, which can be shared as public goods between  
398 bacterial cells, and examined competitive dynamics between virulence factor  
399 producing and non-producing strains in the host. We found that siderophores  
400 (pyoverdine and pyochelin) and the Las and Rhl QS-systems (i) are expressed  
401 inside the host; (ii) affect the ability to colonize and reside within the  
402 nematodes; (iii) allow non-producers to benefit from virulence factors secreted  
403 by producers in mixed infections; but (iv) do not allow non-producers to cheat  
404 and outcompete producers. Our results have implications for both the  
405 understanding of bacterial social interactions within hosts, and therapeutic  
406 approaches that aim to manipulate social dynamics between strains for  
407 infection control.

408

409 Numerous *in-vitro* studies have shown that bacterial cooperation can be  
410 exploited by cheating mutants that no longer express the social trait, but  
411 benefit from the cooperative acts performed by others [3, 11, 12, 55, 61–65].

412 These findings contrast with our observations that the spread of non-  
413 producers was constrained within infections. There are multiple ways to  
414 explain this constraint. First, increased spatial structure can limit the diffusion  
415 of secreted metabolites and lead to the physical separation of cooperators and  
416 cheats [63]. Both effects result in metabolites being shared more locally  
417 among cooperative individuals. The physical separation of strains seemed to  
418 explain the results of Zhou *et al* [20], where QS-mutants of *Bacillus*  
419 *thuringiensis* infecting caterpillars could not exploit metabolites from  
420 producers. Conversely, physical separation seemed low in our study system  
421 (Figure 6), and therefore unlikely explains why cheats could not spread. While  
422 we solely focussed on proximity patterns inside hosts, it is important to note  
423 that processes at the meta-population level such as bottlenecking [54, 66], can  
424 reduce the probability of different strains ending up in the same host, and thus  
425 further compromise cheat success.

426

427 Second, negative frequency-dependent selection could explain why the  
428 spread of virulence factor negative mutants is constrained [55]. This scenario  
429 predicts that cheats only experience a selective advantage when rare, but not  
430 when common. The reasoning is that non-producers can only efficiently exploit  
431 public goods when surrounded by many producers. Our competition  
432 experiments indeed provide indirect evidence for negative frequency-  
433 dependent selection in the nematode gut (Figure 5B). Specifically, we  
434 observed that bacterial load was reduced when producers occurred at low  
435 frequency early during infection (6 hpe), a result confirming that non-producers  
436 are worse host colonizers than producers. These correlations disappeared

437 during the competition period (48 hpe), indicating that rare producers might  
438 have experienced a selective advantage and increased in relative frequency,  
439 while common producers lost and decreased in frequency.

440

441 Third, the relatively low bacterial density in the gut could further compromise  
442 the ability of non-producers to cheat (Figure 1D, 5B). Low cell density restricts  
443 the sharing and exploitation of secreted compounds [67, 68]. Mechanisms  
444 responsible for the low bacterial density in the gut (Figure 1D, 5B) could  
445 include the peristaltic activity of the gut, expelling a part of the pathogen  
446 population and the host immune system, killing a fraction of the bacteria [69].

447

448 Fourth, our analysis reveals that, although siderophores and QS-systems play  
449 a role in host colonization, they are not essential (Figure 4). Moreover, the  
450 expression of pyoverdine and QS-systems declined over time (Figure 2).  
451 These two observations indicate that the benefits of cheating might be fairly  
452 low, and that the costs of virulence factor production are reduced at later  
453 stages of the infection. Thus, bacteria might switch from production to  
454 recycling of already secreted public goods [70, 71], an effect that can hamper  
455 the spread of cheats.

456

457 Finally, we show that the regulatory linkage between traits is an important  
458 factor to consider when predicting the putative advantage of non-producers  
459 [72, 73]. For instance, *P. aeruginosa* pyoverdine-negative-mutants  
460 upregulated pyochelin production to compensate for the lack of their primary  
461 siderophore (Figure 3). Thus, if pyoverdine-negative mutants evolve *de novo*,

462 their spread as cheats could be hampered because they invest in pyochelin as  
463 an alternative siderophore [74]. For QS, meanwhile, we observed that the  
464 absence of a functional Las-system resulted in the concomitant collapse of the  
465 Rhl-system. Although *lasR* mutants could be potent cheats, as they are  
466 deficient for multiple social traits, their spread might be hampered because  
467 QS-systems also regulate non-social traits, important for individual fitness [75].

468

469 When relating our insights to previous studies, it turns out that earlier work  
470 produced mixed results with regard to the question whether siderophore- and  
471 QS-deficient mutants can spread within infections. While Harrison *et al.* ([15,  
472 21]; pyoverdine, *P. aeruginosa* in *Galleria mellonella* and *ex-vivo* infection  
473 models) and Zhou *et al.* ([20]; QS, *B. thuringiensis* in *Plutella xylostella*)  
474 showed that the spread of non-producers is constrained, Rumbaugh *et al.*  
475 ([16, 17]; QS; *P. aeruginosa* in mice), Pollitt *et al.* ([19]; QS, *Staphylococcus*  
476 *aureus* in *G. mellonella*) and Diard *et al.* ([18], T3SS-driven inflammation,  
477 *Salmonella typhimorium* in mice) demonstrated cases where non-producers  
478 spread to high frequencies in host populations. While the reported results were  
479 based on strain frequency counts before and after competition, we here show  
480 that information on social trait expression, temporal infection dynamics and  
481 physical interactions among strains within hosts are essential to understand  
482 whether social traits are important and exploitable in a given system. We thus  
483 posit that more such detailed approaches are required to understand the  
484 importance of bacterial social interactions across host systems and infection  
485 contexts and explain differences between them.

486

487 A deeper understanding of bacterial social interactions inside hosts is  
488 particularly relevant for novel therapeutic approaches that seek to take  
489 advantage of cooperator-cheat dynamics inside hosts to control infections. For  
490 instance, it was proposed that strains deficient for virulence factors could be  
491 introduced into established infections [24]. These strains are expected to  
492 spread because of cheating, thereby reducing the overall virulence factor  
493 availability in the population and the damage to the host. Our results reveal  
494 that virulence-factor-negative strains, although eventually gaining a benefit  
495 from producer strains, are unable to spread in populations. Another  
496 therapeutic approach involves the specific targeting of secreted virulence  
497 factors [25, 27]. This approach is thought to reduce damage to the host and to  
498 compromise resistance evolution [30]. Resistant mutants, resuming virulence  
499 factor production, are not expected to spread because they would act as  
500 cooperators, sharing the benefit of secreted goods with susceptible strains  
501 [76–78]. Our results yet indicate that such resistant mutants could get local  
502 benefits and thus increase to a certain frequency in the population [31]. These  
503 confrontations show that the identification of key parameters driving social  
504 interactions across hosts and infection types is of utmost importance to predict  
505 the success of ‘cheat therapies’ and anti-virulence strategies targeting  
506 secreted public goods.

507

### 508 **Acknowledgments**

509 We thank two anonymous reviewers for constructive comments and the  
510 Center of Microscopy and Image Analysis (University of Zürich) for support  
511 with image acquisition and advice on image analysis.

512

### 513 **Funding**

514 This project has received funding from the Swiss National Science Foundation  
515 (grant no. PP00P3\_165835 and 31003A\_182499 to RK and no.  
516 P2ZHP3\_174751 to EG), and the European Research Council under the grant  
517 agreement no. 681295 (to RK).

518

### 519 **Competing Interests**

520 The authors have no competing interests to declare.

521

### 522 **Supplementary Information**

523 Supplementary information is available at the journal's website.

524

### 525 **References:**

- 526 1. Rahme LG, Stevens EJ, Wolfort SF, Shao J, Tompkins RG, Ausubel  
527 FM. Common virulence factors for bacterial pathogenicity in plants and  
528 animals. *Science* 1995; **268**: 1899–902.
- 529 2. Wu HJ, Wang AHJ, Jennings MP. Discovery of virulence factors of  
530 pathogenic bacteria. *Curr Opin Chem Biol* 2008; **12**: 93–101.
- 531 3. Diggle SP, Griffin AS, Campbell GS, West SA. Cooperation and conflict  
532 in quorum-sensing bacterial populations. *Nature* 2007; **450**: 411–414.
- 533 4. Flemming HC, Wingender J, Szewzyk U, Steinberg P, Rice SA,  
534 Kjelleberg S. Biofilms: An emergent form of bacterial life. *Nat Rev*  
535 *Microbiol* 2016; **14**: 563–575.
- 536 5. Henkel JS, Baldwin MR, Barbieri JT. Toxins from bacteria. *EXS* 2010;  
537 **100**: 1–29.
- 538 6. Granato ET, Harrison F, Kümmerli R, Ross-Gillespie A. Do Bacterial

- 539 “Virulence Factors” Always Increase Virulence? A Meta-Analysis of  
540 Pyoverdine Production in *Pseudomonas aeruginosa* As a Test Case.  
541 *Front Microbiol* 2016; **7**: 1952.
- 542 7. Köhler T, Buckling A, van Delden C. Cooperation and virulence of  
543 clinical *Pseudomonas aeruginosa* populations. *Proc Natl Acad Sci USA*  
544 2009; **106**: 6339–6344.
- 545 8. Raymond B, West SA, Griffin AS, Bonsall MB. The dynamics of  
546 cooperative bacterial virulence in the field. *Science* 2012; **337**: 85–88.
- 547 9. Harrison F. Bacterial cooperation in the wild and in the clinic: Are  
548 pathogen social behaviours relevant outside the laboratory? *BioEssays*  
549 2013; **35**: 108–112.
- 550 10. West SA, Diggle SP, Buckling A, Gardner A, Griffin AS. The Social Lives  
551 of Microbes. *Annu Rev Ecol Evol Syst* 2007; **38**: 53–77.
- 552 11. Ghoul M, Griffin AS, West SA. Toward an evolutionary definition of  
553 cheating. *Evolution* 2014; **68**: 318–331.
- 554 12. Özkaya Ö, Balbontín R, Gordo I, Xavier KB. Cheating on Cheaters  
555 Stabilizes Cooperation in *Pseudomonas aeruginosa*. *Curr Biol* 2018; **26**:  
556 2070–2080.
- 557 13. Buckling A, Brockhurst MA. Kin selection and the evolution of virulence.  
558 *Heredity* 2008; **100**: 484–488.
- 559 14. Leggett HC, Brown SP, Reece SE. War and peace: social interactions in  
560 infections. *Philos Trans R Soc Lond B Biol Sci* 2014; **369**: 20130365.
- 561 15. Harrison F, Browning LE, Vos M, Buckling A. Cooperation and virulence  
562 in acute *Pseudomonas aeruginosa* infections. *BMC Biol* 2006; **4**: 21.
- 563 16. Rumbaugh KP, Diggle SP, Watters CM, Ross-Gillespie A, Griffin AS,  
564 West SA. Quorum Sensing and the Social Evolution of Bacterial  
565 Virulence. *Curr Biol* 2009; **19**: 341–345.
- 566 17. Rumbaugh KP, Trivedi U, Watters C, Burton-Chellew MN, Diggle SP,  
567 West SA. Kin selection, quorum sensing and virulence in pathogenic  
568 bacteria. *Proc R Soc B Biol Sci* 2012; **279**: 3584–3588.

- 569 18. Diard M, Garcia V, Maier L, Remus-Emsermann MNP, Regoes RR,  
570 Ackermann M, et al. Stabilization of cooperative virulence by the  
571 expression of an avirulent phenotype. *Nature* 2013; **494**: 353–356.
- 572 19. Pollitt EJG, West SA, Cruz SA, Burton-Chellew MN, Diggle SP.  
573 Cooperation, quorum sensing, and evolution of virulence in  
574 *Staphylococcus aureus*. *Infect Immun* 2014; **82**: 1045–1051.
- 575 20. Zhou L, Slamti L, Nielsen-LeRoux C, Lereclus D, Raymond B. The  
576 Social Biology of Quorum Sensing in a Naturalistic Host Pathogen  
577 System. *Curr Biol* 2014; **24**: 2417–2422.
- 578 21. Harrison F, McNally A, Da Silva AC, Heeb S, Diggle SP. Optimised  
579 chronic infection models demonstrate that siderophore ‘cheating’ in  
580 *Pseudomonas aeruginosa* is context specific. *ISME J* 2017; **11**: 2492–  
581 2509.
- 582 22. Andersen SB, Marvig RL, Molin S, Krogh Johansen H, Griffin AS. Long-  
583 term social dynamics drive loss of function in pathogenic bacteria. *Proc*  
584 *Natl Acad Sci USA* 2015; **112**: 10756–10761.
- 585 23. Andersen SB, Ghoul M, Marvig RL, Lee Z Bin, Molin S, Johansen HK, et  
586 al. Privatisation rescues function following loss of cooperation. *Elife*  
587 2018; **7**: e38594.
- 588 24. Brown SP, West S a, Diggle SP, Griffin AS. Social evolution in micro-  
589 organisms and a Trojan horse approach to medical intervention  
590 strategies. *Philos Trans R Soc Lond B Biol Sci* 2009; **364**: 3157–3168.
- 591 25. Allen RC, Popat R, Diggle SP, Brown SP. Targeting virulence: can we  
592 make evolution-proof drugs? *Nat Rev Microbiol* 2014; **12**: 300–308.
- 593 26. Granato ET, Ziegenhain C, Marvig RL, Kümmerli R. Low spatial  
594 structure and selection against secreted virulence factors attenuates  
595 pathogenicity in *Pseudomonas aeruginosa*. *ISME J* 2018; **12**: 2907–  
596 2918.
- 597 27. André JB, Godelle B. Multicellular organization in bacteria as a target for  
598 drug therapy. *Ecol Lett* 2005; **8**: 800–810.



- 599 28. Clatworthy AE, Pierson E, Hung DT. Targeting virulence: a new  
600 paradigm for antimicrobial therapy. *Nat Chem Biol* 2007; **3**: 541–548.
- 601 29. Rasko DA, Sperandio V. Anti-virulence strategies to combat bacteria-  
602 mediated disease. *Nat Rev Drug Discov* 2010; **9**: 117–128.
- 603 30. Pepper JW. Drugs that target pathogen public goods are robust against  
604 evolved drug resistance. *Evol Appl* 2012; **5**: 757–761.
- 605 31. Rezzoagli C, Wilson D, Weigert M, Wyder S, Kümmerli R. Probing the  
606 evolutionary robustness of two repurposed drugs targeting iron uptake in  
607 *Pseudomonas aeruginosa*. *Evol Med Public Heal* 2018; **1**: 246–259.
- 608 32. Tan MW, Ausubel FM. *Caenorhabditis elegans*: A model genetic host to  
609 study *Pseudomonas aeruginosa* pathogenesis. *Curr Opin Microbiol*  
610 2000; **3**: 29–34.
- 611 33. Ewbank JJ. Tackling both sides of the host – pathogen equation with  
612 *Caenorhabditis elegans*. *Microbes Infect* 2002; **4**: 247–256.
- 613 34. Papaioannou E, Utari P, Quax W. Choosing an Appropriate Infection  
614 Model to Study Quorum Sensing Inhibition in *Pseudomonas Infections*.  
615 *Int J Mol Sci* 2013; **14**: 19309–19340.
- 616 35. Félix M-A, Braendle C. The natural history of *Caenorhabditis elegans*.  
617 *Curr Biol* 2010; **20**: R965–R969.
- 618 36. Portal-Celhay C, Bradley ER, Blaser MJ. Control of intestinal bacterial  
619 proliferation in regulation of lifespan in *Caenorhabditis elegans*. *BMC*  
620 *Microbiol* 2012; **12**: 49.
- 621 37. Tan MW, Mahajan-Miklos S, Ausubel FM. Killing of *Caenorhabditis*  
622 *elegans* by *Pseudomonas aeruginosa* used to model mammalian  
623 bacterial pathogenesis. *Proc Natl Acad Sci USA* 1999; **96**: 715–20.
- 624 38. Jimenez PN, Koch G, Thompson JA, Xavier KB, Cool RH, Quax WJ.  
625 The multiple signaling systems regulating virulence in *Pseudomonas*  
626 *aeruginosa*. *Microbiol Mol Biol Rev* 2012; **76**: 46–65.
- 627 39. Meyer JM, Neely A, Stintzi A, Georges C, Holder IA. Pyoverdinin is  
628 essential for virulence of *Pseudomonas aeruginosa*. *Infect Immun* 1996;

- 629           **64**: 518–523.
- 630   40.   Takase H, Nitanaï H, Hoshino K, Otani T. Impact of Siderophore  
631           Production on *Pseudomonas aeruginosa* Infections in  
632           Immunosuppressed Mice. *Infect Immun* 2000; **68**: 1834–1839.
- 633   41.   Cornelis P, Dingemans J. *Pseudomonas aeruginosa* adapts its iron  
634           uptake strategies in function of the type of infections. *Front Cell Infect*  
635           *Microbiol* 2013; **3**: 1–7.
- 636   42.   Smith RS, Iglewski BH. *P. aeruginosa* quorum-sensing systems and  
637           virulence. *Curr Opin Microbiol* 2003; **6**: 56–60.
- 638   43.   Alibaud L, Köhler T, Coudray A, Prigent-Combaret C, Bergeret E, Perrin  
639           J, et al. *Pseudomonas aeruginosa* virulence genes identified in a  
640           *Dictyostelium* host model. *Cell Microbiol* 2008; **10**: 729–740.
- 641   44.   Lee J, Zhang L. The hierarchy quorum sensing network in  
642           *Pseudomonas aeruginosa*. *Protein Cell* 2015; **6**: 26–41.
- 643   45.   Zaborin A, Romanowski K, Gerdes S, Holbrook C, Lepine F, Long J, et  
644           al. Red death in *Caenorhabditis elegans* caused by *Pseudomonas*  
645           *aeruginosa* PAO1. *Proc Natl Acad Sci USA* 2009; **106**: 6327–32.
- 646   46.   Kirienko N V., Kirienko DR, Larkins-Ford J, Whlby C, Ruvkun G,  
647           Ausubel FM. *Pseudomonas aeruginosa* disrupts *Caenorhabditis elegans*  
648           iron homeostasis, causing a hypoxic response and death. *Cell Host*  
649           *Microbe* 2013; **13**: 406–416.
- 650   47.   Cezairliyan B, Vinayavekhin N, Grenfell-Lee D, Yuen GJ, Saghatelian A,  
651           Ausubel FM. Identification of *Pseudomonas aeruginosa* phenazines that  
652           kill *Caenorhabditis elegans*. *PLOS Pathog* 2013; **9**: e1003101.
- 653   48.   Zhu J, Cai X, Harris TL, Gooyit M, Wood M, Lardy M, et al. Disarming  
654           *Pseudomonas aeruginosa* Virulence Factor LasB by Leveraging a  
655           *Caenorhabditis elegans* Infection Model. *Chem Biol* 2015; **22**: 483–491.
- 656   49.   Stiernagle T. Maintenance of *C. elegans*. In: The *C.elegans* Research  
657           Community (ed). *WormBook: The Online Review of C. elegans Biology*.  
658           2006.

- 659 50. Portman DS. Profiling *C. elegans* gene expression with DNA  
660 microarrays. In: The *C. elegans* Research Community (ed). *WormBook:*  
661 *The Online Review of C. elegans Biology*. 2006.
- 662 51. Sommer C, Strähle C, Köthe U, Hamprecht FA. ilastik: Interactive  
663 Learning and Segmentation Toolkit. *Eighth IEEE Int. Symp. Biomed.*  
664 *Imaging (ISBI). Proc.* 2011. pp 230–233.
- 665 52. Schindelin J, Arganda-Carreras I, Frise E, Kaynig V, Longair M, Pietzsch  
666 T, et al. Fiji: an open-source platform for biological-image analysis. *Nat*  
667 *Methods* 2012; **9**: 676–82.
- 668 53. Preibisch S, Saalfeld S, Tomancak P. Globally optimal stitching of tiled  
669 3D microscopic image acquisitions. *Bioinformatics* 2009; **25**: 1463–  
670 1465.
- 671 54. Vega NM, Gore J. Stochastic assembly produces heterogeneous  
672 communities in the *Caenorhabditis elegans* intestine. *PLOS Biol* 2017;  
673 **15**: e2000633.
- 674 55. Ross-Gillespie A, Gardner A, West SA, Griffin AS. Frequency  
675 dependence and cooperation: theory and a test with bacteria. *Am Nat*  
676 2007; **170**: 331–342.
- 677 56. Kocsis E, Trus BL, Steer CJ, Bisher ME, Steven AC. Image averaging of  
678 flexible fibrous macromolecules: the clathrin triskelion has an elastic  
679 proximal segment. *J Struct Biol* 1991; **107**: 6–14.
- 680 57. R Development Core Team. R: A language and environment for  
681 statistical computing. *R Foundation for Statistical Computing*. 2013.  
682 Vienna, Austria.
- 683 58. Dumas Z, Ross-Gillespie A, Kümmerli R. Switching between apparently  
684 redundant iron-uptake mechanisms benefits bacteria in changeable  
685 environments. *Proc Biol Sci* 2013; **280**: 20131055.
- 686 59. Van Gestel J, Weissing FJ, Kuipers OP, Kovács ÁT. Density of founder  
687 cells affects spatial pattern formation and cooperation in *Bacillus subtilis*  
688 biofilms. *ISME J* 2014; **8**: 2069–2079.

- 689 60. Weigert M, Kümmerli R. The physical boundaries of public goods  
690 cooperation between surface-attached bacterial cells. *Proc R Soc B Biol*  
691 *Sci* 2017; **284**: 20170631.
- 692 61. Griffin AS, West SA, Buckling A. Cooperation and competition in  
693 pathogenic bacteria. *Nature* 2004; **430**: 1024–1027.
- 694 62. Sandoz KM, Mitzimberg SM, Schuster M. Social cheating in  
695 *Pseudomonas aeruginosa* quorum sensing. *Proc Natl Acad Sci USA*  
696 2007; **104**: 15876–81.
- 697 63. Kümmerli R, Griffin AS, West S a, Buckling A, Harrison F. Viscous  
698 medium promotes cooperation in the pathogenic bacterium  
699 *Pseudomonas aeruginosa*. *Proc Biol Sci* 2009; **276**: 3531–3538.
- 700 64. Popat R, Crusz SA, Messina M, Williams P, West SA, Diggle SP.  
701 Quorum-sensing and cheating in bacterial biofilms. *Proc R Soc B Biol*  
702 *Sci* 2012; **279**: 4765–4771.
- 703 65. O’Brien S, Luján AM, Paterson S, Cant MA, Buckling A. Adaptation to  
704 public goods cheats in *Pseudomonas aeruginosa*. *Proc R Soc B Biol Sci*  
705 2017; **284**: 20171089.
- 706 66. van Leeuwen E, O’Neill S, Matthews A, Raymond B. Making pathogens  
707 sociable: The emergence of high relatedness through limited host  
708 invasibility. *ISME J* 2015; **9**: 2315–2323.
- 709 67. Ross-Gillespie A, Gardner A, Buckling A, West SA, Griffin AS. Density  
710 dependence and cooperation: theory and a test with bacteria. *Evolution*  
711 2009; **63**: 2315–2325.
- 712 68. Scholz RL, Greenberg EP. Sociality in *Escherichia coli*: Enterochelin Is a  
713 Private Good at Low Cell Density and Can Be Shared at High Cell  
714 Density. *J Bacteriol* 2015; **197**: 2122–2128.
- 715 69. Pukkila-Worley R, Ausubel FM. Immune defense mechanisms in the  
716 *Caenorhabditis elegans* intestinal epithelium. *Curr Opin Immunol* 2012;  
717 **24**: 3–9.
- 718 70. Imperi F, Tiburzi F, Visca P. Molecular basis of pyoverdine siderophore

- 719 recycling in *Pseudomonas aeruginosa*. *Proc Natl Acad Sci USA* 2009;  
720 **106**: 20440–20445.
- 721 71. Kümmerli R, Brown SP. Molecular and regulatory properties of a public  
722 good shape the evolution of cooperation. *Proc Natl Acad Sci USA* 2010;  
723 **107**: 18921–6.
- 724 72. Lindsay RJ, Kershaw MJ, Pawlowska BJ, Talbot NJ, Gudelj I.  
725 Harboring public good mutants within a pathogen population can  
726 increase both fitness and virulence. *Elife* 2016; **5**: 1–25.
- 727 73. dos Santos M, Ghoul M, West SA. Pleiotropy, cooperation and the social  
728 evolution of genetic architecture. *PLOS Biol* 2018; **16**: e2006671.
- 729 74. Ross-Gillespie A, Dumas Z, Kümmerli R. Evolutionary dynamics of  
730 interlinked public goods traits: An experimental study of siderophore  
731 production in *Pseudomonas aeruginosa*. *J Evol Biol* 2015; **28**: 29–39.
- 732 75. Dandekar AA, Chugani S, Greenberg PE. Bacterial Quorum Sensing  
733 and Metabolic Incentives to Cooperate. *Science* 2012; **338**: 264–266.
- 734 76. Mellbye B, Schuster M. The sociomicrobiology of antivirulence drug  
735 resistance: a proof of concept. *MBio* 2011; **2**: e00131-11.
- 736 77. Gerdt JP, Blackwell HE. Competition Studies Confirm Two Major  
737 Barriers That Can Preclude the Spread of Resistance to Quorum-  
738 Sensing Inhibitors in Bacteria. *ACS Chem Biol* 2014; **9**: 2291–2299.
- 739 78. Ross-Gillespie A, Weigert M, Brown SP, Kümmerli R. Gallium-mediated  
740 siderophore quenching as an evolutionarily robust antibacterial  
741 treatment. *Evol Med Public Heal* 2014; **2014**: 18–29.
- 742

743 **Figure captions**

744 **Figure 1. Quantifying *P. aeruginosa* infections in the *C. elegans* gut. (A)**

745 Experimental procedure: we used fluorescently tagged *P. aeruginosa* strains  
746 to examine bacterial colonization of the *C. elegans* gut. Per experiment, we  
747 exposed approximately 200 *C. elegans* nematodes to a lawn of mCherry-  
748 tagged PAO1 strains for 24 hours. Subsequently, nematodes were removed  
749 from the bacterial plate, surface washed and collected in sterile buffer for  
750 monitoring. After 0, 6, or 30 hours post exposure (hpe), approximately 30  
751 nematodes were immobilized and transferred to microscopy slides for imaging.  
752 (B) Brightfield and fluorescence channel merged image depicting mCherry-  
753 fluorescent bacteria inside the host gut. (C) Bacterial load inside the nematode  
754 was quantified as the sum of fluorescence intensity across pixels in the region  
755 of interest "ROI" (yellow outline) and standardised by total worm area. (D)  
756 Colonization dynamics of the wildtype strain PAO1-*mCherry*: immediately after  
757 removal from the exposure plate (0 hpe), worms showed high bacterial loads  
758 inside their guts. Bacterial load first declined when the worms were kept in  
759 buffer for 6 hours, but then remained constant for the next 24 hours. Grey  
760 shaded area indicates background fluorescence (mean +/- standard deviation)  
761 of worms exposed to the non-fluorescent, non-pathogenic *E.coli* OP50. N =  
762 number of worms from four independent experiments. \*\*\* =  $p < 0.001$ , n.s. =  
763 not statistically significant.

764

765 **Figure 2. *P. aeruginosa* expresses genes for pyoverdine synthesis and**  
766 **quorum sensing regulators in the host gut.** To quantify the expression of

767 virulence factor genes inside hosts, worms were exposed to four PAO1

768 strains, each containing a promoter::*mCherry* fusion for either *pvdA*  
769 (pyoverdine synthesis), *pchEF* (pyochelin synthesis), *lasR* or *rhlR* (quorum  
770 sensing regulators). With the exception of *pchEF*, all genes were significantly  
771 expressed in the host, both at 0 and 30 hpe. Expression levels were  
772 standardised for bacterial load. Grey shaded areas depict background  
773 fluorescence (mean +/- standard deviation) of worms exposed to the non-  
774 fluorescent, non-pathogenic *E.coli* OP50. N = number of worms from four  
775 independent experiments. \* =  $p < 0.05$ ; \*\* =  $p < 0.01$ , \*\*\* =  $p < 0.001$ , n.s. = not  
776 statistically significant.

777

778 **Figure 3. *P. aeruginosa* can switch between siderophores, while quorum**  
779 **sensing regulators act hierarchically.** Because virulence traits are linked at  
780 the regulatory level, we measured gene expression of each trait in the  
781 negative background of the co-regulated trait. (A) The expression of the  
782 pyoverdine synthetic gene *pvdA* is significantly expressed in the wildtype and  
783 the pyochelin-negative background, but slightly reduced in the latter. (B) The  
784 pyochelin synthetic gene *pchEF* is significantly expressed in the pyoverdine-  
785 negative background, but silent in the wildtype. (C) The expression of the QS-  
786 regulator gene *lasR* is unchanged in the Rhl-negative background compared  
787 to the wildtype. (D) The expression of the QS-regulator gene *rhlR* is reduced in  
788 the Las-negative background. Expression levels were standardised for  
789 bacterial load. Grey shaded areas depict background fluorescence (mean +/-  
790 standard deviation) of worms exposed to the non-fluorescent, non-pathogenic  
791 *E.coli* OP50. N = number of worms form four independent experiments. \* =  $p <$   
792  $0.05$ ; \*\* =  $p < 0.01$ , \*\*\* =  $p < 0.001$ , n.s. = not statistically significant.

793

794 **Figure 4. Virulence factor production affects bacterial uptake and host**  
795 **colonization ability.** (A) Bacterial load inside *C. elegans* guts measured  
796 immediately after the recovery of worms from the exposure plates (0 hours  
797 post exposure; hpe). Comparisons across isogenic PAO1 mutant strains, each  
798 deficient for the production of one or two virulence factors, reveal that the two  
799 quorum-sensing mutants PAO1 $\Delta$ *lasR* and PAO1 $\Delta$ *rhIR* reached lower bacterial  
800 densities than the wildtype. (B) Comparison of the relative colonization  
801 success of strains (ratio of bacterial loads at 0 hpe versus 30 hpe) revealed  
802 that the siderophore-negative strain PAO1 $\Delta$ *pvdD* $\Delta$ *pchEF* showed significantly  
803 reduced ability to remain in the host compared to the wildtype. In contrast, the  
804 colonisation success of PAO1 $\Delta$ *pchEF* and PAO1 $\Delta$ *rhIR* was increased relative  
805 to the wildtype. Grey shaded areas depict background fluorescence (mean +/-  
806 standard deviation) of worms exposed to the non-fluorescent, non-pathogenic  
807 *E.coli* OP50. N = number of worms from four independent experiments. \* =  $p <$   
808 0.05; \*\* =  $p <$  0.01, \*\*\* =  $p <$  0.001.

809

810 **Figure 5. Mixed infections reveal social strain dynamics but no**  
811 **successful cheating.** (A) Relative fitness of the wildtype PAO1-*mCherry* after  
812 42 hours of competition inside the *C. elegans* gut against an untagged PAO1  
813 control strain; the siderophore-negative strain PAO1 $\Delta$ *pvdD* $\Delta$ *pchEF*; and the  
814 Las-negative strain PAO1 $\Delta$ *lasR*. The control competition revealed a mild but  
815 significant negative effect of the mCherry tag on wildtype fitness. When  
816 accounting for these mCherry costs, we found that the putative cheat strains  
817 PAO1  $\Delta$ *lasR* and PAO1  $\Delta$ *pvdD* $\Delta$ *pchEF* performed equally well compared to



818 the wildtype, but could not outcompete it. This suggests that virulence factor  
819 deficient strains benefit from the presence of non-producers but cannot  
820 successfully cheat on them. (B) At 6 hpe, wildtype frequency in mixed  
821 infections correlated positively with total bacterial load inside hosts in  
822 competition with PAO1 $\Delta$ *lasR* (squares and dashed lines) and  
823 PAO1 $\Delta$ *pvdD* $\Delta$ *pchEF* (diamonds and dotted lines) but not in the control  
824 competition (circles and solid lines). These correlations disappeared at 48 hpe.  
825 Each data point represents an individual worm. Data shown in A+B stem from  
826 the same three independent experiments.

827

828 **Figure 6. Spatial structure of mixed infections in the nematode gut.** (A, B)  
829 Illustrative examples of *C. elegans* individuals infected with a mixture of GFP-  
830 and mCherry-labelled strains. Each worm was computationally straightened  
831 and fluorescence intensity values were extracted for each pixel from tail ( $X=0$ )  
832 to head ( $X=1$ ). We then calculated the Spearman correlation coefficient  $\rho$   
833 between the intensity values in the two fluorescence channels across pixels,  
834 as our estimate of strain colocalization. Examples show worms with high (A)  
835 and low (B) degrees of colocalization. (C) Patterns of colocalization levels  
836 varied substantially between individuals, but did not differ across strain  
837 combinations ( $p = 0.119$ : wildtype PAO1-*mCherry* versus: (i) wildtype PAO1-  
838 *gfp* (circles), (ii) PAO1 $\Delta$ *pvdD* $\Delta$ *pchEF*-*mCherry* (diamonds) or (iii) PAO1 $\Delta$ *lasR*-  
839 *mCherry* (squares). Each data point represents an individual worm. Data  
840 stems from 3 independent experiments, with 12 replicates each.

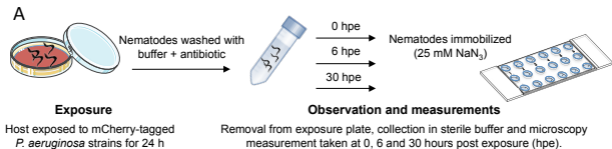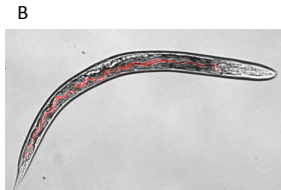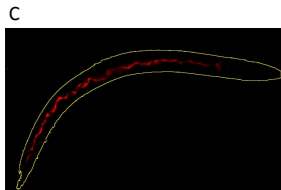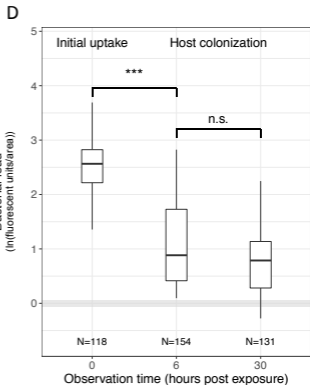

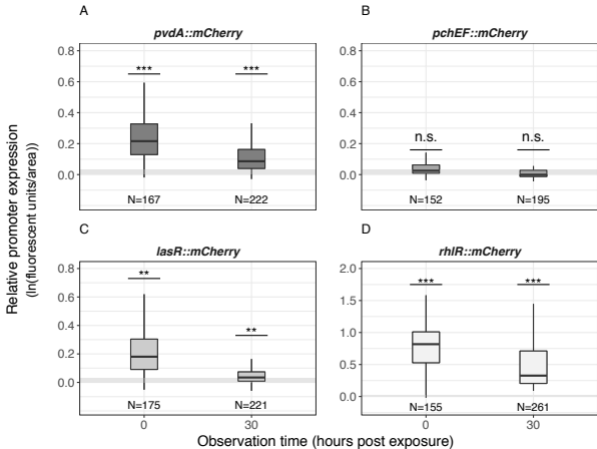

Relative promoter expression  
( $\ln(\text{fluorescent units/area})$ )

A

*pvdA::mCherry*

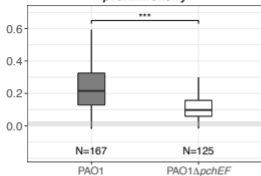

B

*pchEF::mCherry*

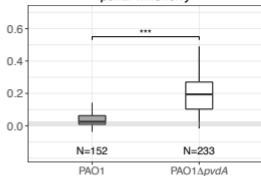

C

*lasR::mCherry*

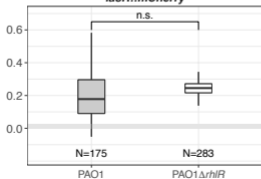

D

*rhIR::mCherry*

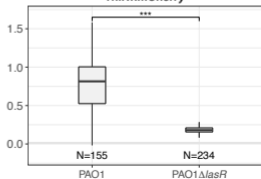

Strain

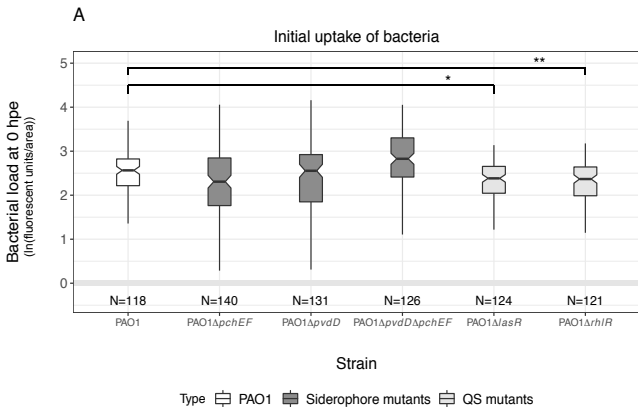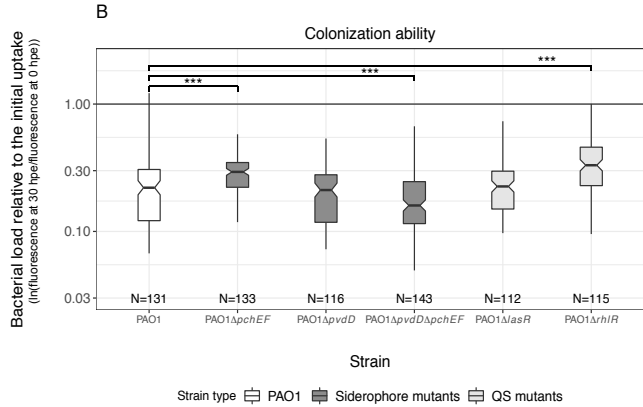

Fitness of PAO1-*mCherry* ( $\ln(\text{fitness})$ )

**A**

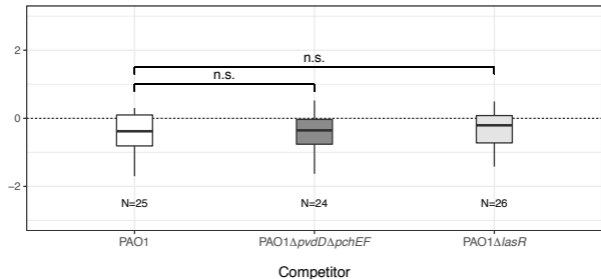

**B**

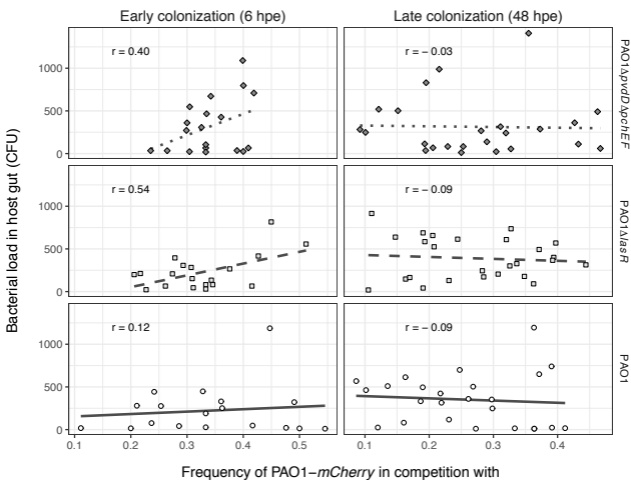

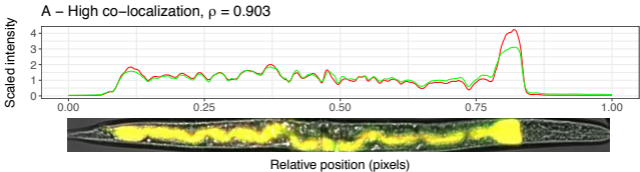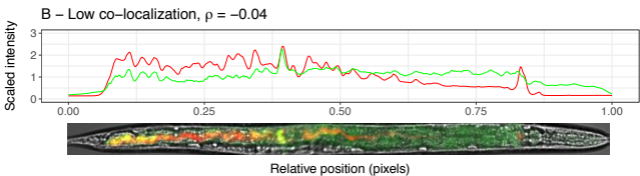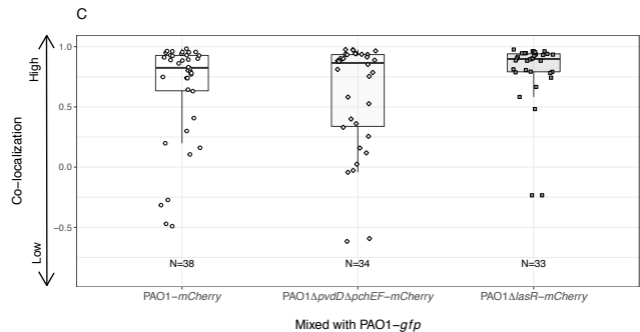

Source: https://www.biorxiv.org/content/10.1101/488262v3.full.pdf
